1 Adipose gene expression profiles reveal novel insights into the  
2 adaptation of northern Eurasian semi-domestic reindeer  
3 (*Rangifer tarandus*)

4 **Short title:** Reindeer adipose transcriptome

5  
6 Melak Weldenegodguad<sup>1, 2</sup>, Kisun Pokharel<sup>1¶</sup>, Laura Niiranen<sup>3¶</sup>, Päivi Soppela<sup>4</sup>,  
7 Innokentyi Ammosov<sup>5</sup>, Mervi Honkatukia<sup>6</sup>, Heli Lindeberg<sup>7</sup>, Jaana Peippo<sup>1, 6</sup>, Tiina  
8 Reilas<sup>1</sup>, Nuccio Mazzullo<sup>4</sup>, Kari A. Mäkelä<sup>3</sup>, Tommi Nyman<sup>8</sup>, Arja Tervahauta<sup>2</sup>,  
9 Karl-Heinz Herzig<sup>9, 10, 11</sup>, Florian Stammler<sup>4</sup>, Juha Kantanen<sup>1\*</sup>

10

11 <sup>1</sup> Natural Resources Institute Finland (Luke), Jokioinen, Finland

12 <sup>2</sup> Department of Environmental and Biological Sciences, University of Eastern  
13 Finland, Kuopio, Finland

14 <sup>3</sup> Research Unit of Biomedicine, Faculty of Medicine, University of Oulu, Oulu,  
15 Finland

16 <sup>4</sup> Arctic Centre, University of Lapland, Rovaniemi, Finland

17 <sup>5</sup> Board of Agricultural Office of Eveno-Bytantaj Region, Batagay-Alyta, The Sakha  
18 Republic (Yakutia), Russia

19 <sup>6</sup> NordGen—Nordic Genetic Resource Center, Ås, Norway

20 <sup>7</sup> Natural Resources Institute Finland (Luke), Maaninka, Finland

21 <sup>8</sup> Department of Ecosystems in the Barents Region, Norwegian Institute of  
22 Bioeconomy Research, Svanvik, Norway

23 <sup>9</sup> Research Unit of Biomedicine, Medical Research Center, Faculty of Medicine,  
24 University of Oulu

25 <sup>10</sup> Oulu University Hospital, Oulu, Finland

26 <sup>11</sup> Pediatric Institute, Poznan University of Medical Sciences, Poznan, Poland

27

28 \* Corresponding author

29 Email: [juha.kantanen@luke.fi](mailto:juha.kantanen@luke.fi) (JK)

30 ¶ These authors contributed equally to this work.

## 31 **Abstract**

32 Reindeer (*Rangifer tarandus*) are semi-domesticated animals adapted to the  
33 challenging arctic conditions of northern Eurasia. Adipose tissues play a crucial role  
34 in animals living in northern environments by altering gene expression in their  
35 tissues to regulate energy homeostasis and thermogenic activity. Here, we  
36 performed transcriptome profiling by RNA sequencing of adipose tissues from three  
37 different anatomical depots: metacarpal (bone marrow), perirenal, and prescapular  
38 fat in Finnish and Even reindeer (in Sakha) during two seasonal time points (spring  
39 and winter). On average 36.5 million pair-ended clean reads were obtained for each  
40 sample, and a total of 16,362 genes were expressed in our data. Gene expression  
41 profiles in metacarpal tissue were distinct and clustered separately from perirenal  
42 and prescapular adipose tissues. Notably, metacarpal adipose tissue appeared to  
43 have a significant role in the regulation of the energy metabolism of reindeer in  
44 spring when their nutritional condition is poor after winter. During spring, when the  
45 animals are in less optimal condition, genes associated with the immune system  
46 (e.g., *CCL2*, *CCL11*, *CXCL14*, *IGSF3*, *IGHM*, *IGLC7*, *IGKC*, *JCHAIN*, and *IGSF10*)

47 were upregulated in the perirenal and prescapular adipose tissue, while genes  
48 involved in energy metabolism (e.g., *ACOT2*, *APOA1*, *ANGPTL1*, *ANGPTL8*,  
49 *ELOVL7*, *MSMO1*, *PFKFB1*, and *ST3GAL6*) were upregulated in metacarpal  
50 tissue. Even reindeer harboured relatively fewer significantly differentially  
51 expressed genes than Finnish reindeer, irrespective of the season, possibly owing  
52 to climatic and management differences. Moreover, blood and tissue parameters  
53 reflecting general physiological and metabolic status showed less seasonal  
54 variation in Even reindeer than in Finnish reindeer. This study identified adipose  
55 candidate genes potentially involved in immune response, fat deposition, energy  
56 metabolism, development, cell growth, and organogenesis. Taken together, this  
57 study provides new information on the mechanisms by which reindeer adapt to less  
58 optimal arctic conditions.

59 **Keywords:** adaptation; immune process; *PRDM9*; lipid metabolism; metabolites;  
60 metacarpal adipose tissue; mRNA; perirenal adipose tissue; prescapular adipose  
61 tissue; *UCP1*

## 62 **Introduction**

63 Native to northern and subarctic regions of Eurasia, reindeer (*Rangifer tarandus*)  
64 have societal, cultural, and ecological values for the livelihoods of arctic indigenous  
65 people and pastoralists, and have multiple socio-economic roles, such as providing  
66 meat, hides, milk, and serving as a means of transportation [1–3]. Reindeer survive  
67 in challenging northern and extreme arctic environments characterized by low  
68 temperatures, prolonged daylight during summers, and darkness and limited  
69 availability of grazing resources during long winters [3,4]. Adipose tissues are vital

70 for reindeer to adapt to such extreme conditions [5,6]. Adipose tissues are important  
71 organs for several functions in energy metabolism that are crucial for survival and  
72 successful reproduction. White adipose tissue (WAT) stores energy in the form of  
73 lipids and serves as a long-term energy reserve, whereas brown adipose tissue  
74 (BAT) contributes to both thermohomeostasis and energy balance by producing heat  
75 via the function of uncoupling protein 1 (*UCP1*) [7]. WAT is also an important  
76 endocrine organ that secretes several hormones, including adipomyokines and  
77 cytokines, which contribute to energy metabolism and immunity and act as signals to  
78 the central nervous system [8,9]. The reindeer is a lean animal, but it also relies on  
79 WAT as a source of energy and hormonal signals in changing environmental  
80 conditions [5]. In newborn reindeer, BAT plays a crucial role in regulating  
81 non-shivering thermogenesis, but its effect diminishes over time [10,11]. However,  
82 browning of WAT has been observed in various species during later stages of life  
83 after chronic cold exposure [12] and due to pharmacological and nutritional agents  
84 [13]. Bone marrow has a specific type of adipose tissue (BMAT) that acts as an  
85 energy reservoir, contributes to local and systemic metabolic processes [14,15], and  
86 undergoes dynamic changes [16]. BMAT decreases as a result of starvation in freely  
87 grazing animals [17–19].

88 The majority of adipose transcriptome studies using high-throughput RNA  
89 sequencing (RNA-Seq) have been limited to mice [20,21], sheep [22–24], pigs  
90 [25–27], and humans [28–30]. Adipose transcriptomes are affected by the type of  
91 adipose, as well as by the sex and age of the animal [31]. Changes in gene  
92 expression within adipose tissues in response to temperature fluctuations have been

93 studied mostly in mice so far [20,21,32]. However, gene expression profiles in  
94 reindeer adipose tissues have thus far not been investigated. Adipose tissues from  
95 various parts of the body have their own unique functions. In the present study, we  
96 investigated gene expression profiles of three adipose tissue depots: metacarpal  
97 (M), perirenal (P), and prescapular (S) tissues. These adipose depots were selected  
98 because they represent visceral (P), peripheral (S), and bone marrow (M) fat. These  
99 anatomical depots are also expected to reflect different metabolic functions. For  
100 example, the prescapular area is a major BAT depot in newborn reindeer [11] and  
101 thus an interesting target for regulating the expression of *UCP1*, as well as other  
102 markers for cold adaptation. The samples were collected from the Finnish and Even  
103 (Sakha Republic, Yakutia, Russia) reindeer breeds (or populations), which belong to  
104 two different phylogenetic clusters of Eurasian reindeer (Pokharel K. et al.,  
105 unpublished) and differ in present-day management and feeding practices. In  
106 Yakutia, reindeer feed on natural pastures with expressed seasonal variation and  
107 high migratory behaviour (high lichen content in winter, fresh leaves in spring, grass,  
108 and mountain herbs in summer), whereas in Finland, extra fodder (concentrates) is  
109 provided during peak winter (February and March). Reindeer herders observe that  
110 the lichen-rich diet in winter helps reindeer keep their weight and survive the cold,  
111 while the grassy diet in summer accounts for the principal annual gain in weight. In  
112 Yakutia, reindeer have to survive in extreme climatic conditions where the annual  
113 temperature fluctuates from  $-60^{\circ}\text{C}$  up to more than  $+30^{\circ}\text{C}$ .

114 Here, we aim to obtain insights into the seasonal fluctuations in the  
115 transcriptome profiles of three adipose tissues (metacarpal, perirenal, and  
116 prescapular) in two reindeer populations (Even and Finnish). The tissue sampling  
117 was conducted during (early) winter (November–December) and (early) spring  
118 (April), when the animals were in the best and worst nutritional conditions,

119 respectively. For the Even reindeer, we also compared the transcriptome profiles of  
120 these adipose tissues between male and female individuals. Moreover, to assess  
121 the health and physiological condition of the reindeer in different seasons and  
122 geographical locations, and to complement genetic analyses with phenotypic data,  
123 we analysed several blood metabolites along with hormones regulating energy  
124 metabolism, such as blood insulin, leptin, and hormone sensitive lipase (HSL), and  
125 proteins such as *UCP1* and *COX4* from adipose tissue. We expect that assessing  
126 changes in gene expression in reindeer adipose tissue due to seasonal variation  
127 may reveal adaptation mechanisms and help to understand the evolution of this  
128 adaptive response in reindeer and other mammalian species sharing northern  
129 Eurasian habitat conditions.

## 130 **Results**

### 131 **RNA sequencing and mapping**

132 A total of 220.5 gigabases (Gb) of RNA-seq data were generated from 56  
133 adipose tissue samples collected from 19 Finnish and Even reindeer. As the  
134 adapters were trimmed automatically, and the Phred quality scores of the reads from  
135 all samples were greater than 30, we did not perform further trimming and quality  
136 filtering. The number of reads per sample ranged from 26.6 million (M) (4.0 Gb) to  
137 217 M (32.6 Gb), with a mean of high-quality 36.5 M, 2 × 75 bp pair-ended reads per  
138 sample (S1 Table). As shown in S1 Table, the two samples (FR12\_SCAP and  
139 YR1\_SCAP), revealing the highest numbers of reads (217 M and 165 M,  
140 respectively), will be used to detect lncRNAs in a future study. The proportion of  
141 reads mapped to the reindeer reference genome ranged from 81% to 92%, with, on

142 average, >90% of the reads from each sample uniquely mapped to the reindeer draft  
143 genome assembly (S2 Table). Raw sequence reads in compressed fastq format  
144 (fastq.gz) analyzed in this study have been deposited to the European Nucleotide  
145 Archive (ENA) and are publicly available under accession **XXXXXX**

## 146 Gene expression overview

147 A total of 16,362 genes were expressed (cpm > 0.5 in at least two samples) in  
148 all 56 samples (S3 Table), representing approximately 60% of the 27,332 reindeer  
149 genes reported in the draft reindeer genome assembly annotation file [3]. The  
150 highest number of genes were expressed in metacarpal adipose tissue (n = 15,761),  
151 followed by prescapular (n = 15,087) and perirenal (n = 14,920) adipose tissues.  
152 Moreover, we examined the expressed genes across these three tissues to search  
153 for shared and uniquely expressed genes in the respective region and season (Fig  
154 1). In all cohorts (spring and winter Finnish and Even samples), the highest number  
155 of expressed genes was found in the metacarpal adipose tissue. This tissue also  
156 displayed a higher number of tissue-specific expressed genes than did the perirenal  
157 and prescapular adipose tissues (Fig 1). In various region-season comparisons  
158 between the adipose tissues, >13,000 genes were commonly expressed. To assess  
159 expression similarity among the samples, we performed Principal Component  
160 Analysis PCA based on the top 500 most variable genes (Fig 2, S1 Fig). The PCA  
161 plot (Fig 2) shows that the metacarpal tissue samples were clustered separately  
162 from the other two tissues, and additional grouping of the samples along axis 2  
163 based on two reindeer breeds. Similarly, a hierarchal clustering based on the top 25  
164 genes with the highest variance across all samples also showed a similar pattern  
165 that clearly separated metacarpal tissue and the other tissues (S2 Fig).

166 While more than 13,000 genes were commonly expressed in all tissues, several  
167 tissue-specific genes were identified in this study. In line with the distinct cluster  
168 observed in the PCA plot, more than 730 genes were uniquely expressed in the  
169 metacarpal adipose tissue (Fig 1). We further explored the genes specific to this  
170 tissue by removing the lowly expressed genes (TPM < 1). Out of 875 genes, 61  
171 were commonly expressed in metacarpal adipose tissue in the different  
172 experimental groups. The metacarpal adipose tissue of Finnish reindeer  
173 collected in the winter had the largest number of uniquely expressed genes (n =  
174 181), whereas Finnish metacarpal tissue collected in the spring possessed the  
175 lowest (n = 71) number of uniquely expressed genes. By contrast, Even reindeer  
176 samples collected in either season had roughly similar numbers of uniquely  
177 expressed genes (138 in spring and 136 in winter samples) (Fig 3).

178 Among the 61 genes that were unique to metacarpal adipose tissue yet shared  
179 by Finnish and Even reindeer, annotations were not available for 10 genes. The  
180 metacarpal-specific genes included several homeobox proteins (eg. *HOXD13*,  
181 *HOXA11*, *HOXD11*, *HOXA13*, *DLXC*), bone sialoprotein 2 (*IBSP*), osteomodulin  
182 (*OMD*), carbonic anhydrase 3 (*CA3*), C-X-C motif chemokine 10 (*CXCL10*),  
183 nuclear receptor-interacting protein 3 (*NRIP3*), and R-spondin-2 (*RSPO2*)  
184 (S4Table).

## 185 Results from differential gene expression analyses

186 **Seasonal differences in gene expression.** For an insight into the effects of  
187 seasonal conditions, we compared gene expression profiles of adipose tissues from  
188 spring versus winter samples separately in the Finnish and Even reindeer. Finnish



189 reindeer showed a higher number of significant differentially expressed genes  
190 (DEGs) than the Even reindeer (Table 2).

191

192 **Table 2.** The number of significantly identified differentially expressed genes (DEGs)  
193 in Finnish (F) and Even (E) reindeer due to seasonal changes (S, spring, W, winter)  
194 in in the metacarpal (M), perirenal (P), and prescapular (S) adipose tissues.

| Comparison    | Total DEGs | Upregulated | Downregulated |
|---------------|------------|-------------|---------------|
| FM-S vs. FM-W | 346        | 195         | 151           |
| FP-S vs. FP-W | 583        | 273         | 310           |
| FS-S vs. FS-W | 611        | 325         | 286           |
| EM-S vs. EM-W | 156        | 57          | 99            |
| EP-S vs. EP-W | 103        | 45          | 58            |
| ES-S vs. ES-W | 176        | 126         | 50            |

195

196 Altogether 346 genes were differentially expressed between seasons in  
197 metacarpal tissues of Finnish reindeer; of these, 195 were upregulated in spring  
198 samples and the rest were upregulated in the winter samples (Table 2, S5 Table and  
199 S4 Fig). Genes involved in metabolism (*ANGPTL8*, *BDH1*, *ASIP*, *QPRT*) and stress  
200 response (*BOLA3*, *GPR158*) were strongly upregulated (LFC > 4) and  
201 those particularly associated with immune functions (*CCL11*, *CXCL8*, *CD33*, *IL1B*,  
202 *IRF4*) were strongly downregulated (LFC < -3.8) in spring metacarpal tissue (S5  
203 Table and S4 Fig).

204 Among 583 DEGs in the perirenal tissue, genes such as *CCL11*, *TRH*, *MT1A*,  
205 *RPL38*, *AREG*, *NPW*, *SRSF3*, *RPS29*, *RPL36A* and *SLC11A1*, were highly  
206 upregulated (LFC > 4) in the spring samples and *MP68*, *RPL39*, *SLC39A12*,  
207 *SCN3A*, *RGS9*, *HSPA6*, *TNFRSF10B*, *EDIL3*, *RTP1* and *ABCC4* were highly

208 downregulated (LFC < -3.7) (Table 2, S6 Table and S5 Fig). The DEGs upregulated  
209 in the spring samples include genes participating in the immune system (*SLC11A1*,  
210 *COMMD6*, *BATF*, *CCL19*), ribosomal and transcription processes (*RPL38*, *RPL36A*,  
211 *FKBP11*). On the other hand, downregulated genes were associated with signalling  
212 or signal transduction (*RGS9*, *RAPGEF5*, *COL4A5*, *PTGER2*, *MAML3*, *PDE5A*), cell  
213 differentiation or organogenesis (*GJA5*, *THSD7A*, *DACH1*, *MMRN2*, *NHSL2*,  
214 *ZFHX3*), and interaction of glucose and fatty acid metabolism (*PDK4*, *SIK1*).

215 The highest number (n = 611) of DEGs was found in prescapular tissue, 325 of  
216 which were upregulated in the spring samples (Table 2, S7 Table and S6 Fig). In  
217 prescapular adipose tissue from the spring, genes such as *SERPINA3-7*, *ESD*,  
218 *APOH*, *SERPINI2*, *SERPINC1*, *TCEB2*, *ITIH1*, *WNT9B*, *C8B*, *TRH*, *ASCL2*, *GSTA2*  
219 and *VPREB1* were among the top upregulated genes (LFC > 4.5) and *LHFP*,  
220 *TNFRSF10B*, *CRISP3*, *NEGR1*, *KCNA2*, *PTGER2*, *HSPA6*, *GTSF1* and *RPL30*  
221 were among the top downregulated genes (LFC < -3.5) (S7 Table and S6 Fig). A  
222 total of 30 genes, including *APOLD1*, *CYP26B1*, *IGFBP5*, *MICA*, *MICB*, *MT-ATP8*,  
223 *PDK4* and *SCP2*, were commonly differentially expressed in three tissues (S3 Fig).  
224 Many of the genes in the prescapular tissue that were upregulated during spring  
225 were associated with inflammatory or immunological responses (*FXJD5*, *CCL19*,  
226 *IFIT3*, *CARD9*, *GMFG*, *SLC11A1*), feeding behaviour (*NPW*), adipogenesis (*DLK1*,  
227 *CITED4*), cell growth or differentiation (*MGP*, *ECSCR*, *TIMP1*, *MT1A*), and  
228 spermatogenesis (*SCHBP1L*, *MORN2*). Similarly, downregulated DEGs were  
229 associated with signalling (*RGS5*, *DCBLD2*, *RASGEF1B*, *RAPGEF5*),  
230 organogenesis (*PTGER2*, *KLF7*, *PHACTR2*, *KMT2A*, *DACH1*, *PDLIM5*), and lipid  
231 metabolism (*ARFGEF3*, *PDK4*, *FOXO1*, *PITPNC1*).

232 Similar pairwise comparison in Even reindeer revealed 156, 103, and 176 DEGs  
233 in metacarpal, perirenal, and prescapular tissues, respectively (Table 2, S8-S10

234 Tables, S8-S10 Figs). Prescapular adipose tissue had the highest number of unique  
235 significant DEGs (n = 141), followed by metacarpal (n = 135), and perirenal (n = 68)  
236 (S7 Fig). In both breeds, prescapular tissue harboured the highest (611 in Finnish  
237 and 176 in Even reindeer) number of DEGs (S7 and S10 Tables). Interestingly, while  
238 the number of upregulated genes was higher in the metacarpal tissue of Finnish  
239 samples from the winter collection, the same was not observed in Even reindeer. In  
240 the Even reindeer we, found seven common DEGs (*ORC5*, *ADI1*, *RPS15A*, *DAGLA*,  
241 *JCHAIN*, *ENSP00000353290*, and *FEZ1*) among all tissues (S7 Fig). DEGs that  
242 were upregulated in the spring samples of Even metacarpal adipose tissue  
243 appeared to have roles in lipid/fatty acid metabolism (*ELOVL7*, *APOA1*, *ACOT2*,  
244 *ANGPTL1*), cell structural functions (*CAPN6*, *MYL9*, *CLDN5*), and oxygen  
245 metabolism (*FMO1*, *FMO2*, *AOC1*, *STEAP1*). Downregulated DEGs in Even  
246 metacarpal adipose tissue were associated with development and organogenesis  
247 (*DMAP1*, *COL27A1*, *CA2*, *NRG3*, *JAK3*, *EPB41L3*, *ESM1*) and immune system  
248 (*C4A*, *IL17RB*, *HLA-DOA*, *SIGLEC1*, *CPA3*). In Even perirenal adipose tissue,  
249 several immunoglobulin related genes were upregulated during spring, suggesting  
250 activation of the immune system by pathogens. However, downregulated genes  
251 were mainly associated with lipid/energy metabolism (*ACACB*, *PRLR*, *APOL6*) and  
252 functions related to growth and development (*MEGF8*, *DAGLA*, *IGSF10*, *GRIP2*,  
253 *NSMF*). Among the three adipose tissues in Even reindeer, immune related DEGs  
254 (e.g., *JCHAIN*, *IGHM*, *IGKC*, *IGHV3-6*, *IGLC7*, *MUCM*) were predominantly  
255 upregulated in the prescapular tissue, whereas downregulated genes in the  
256 prescapular tissue were associated with lipid/energy metabolism (*TP53INP2*,  
257 *PPARGC1B*, *ACACB*) and growth and development (*DAGLA*, *IGS10*, *BMP5*,  
258 *FGFR2*, *NRG3*, *CYP26B1*).

260 **Gene expression differences between the Finnish and Even reindeer.** We  
261 made six pair-wise comparisons (three each for spring and winter samples) to  
262 identify DEGs between Finnish and Even reindeer (Table 3, S11-S16 Tables) of  
263 which the highest number (n = 504) of DEGs was present in metacarpal tissues  
264 collected during winter, whereas the same tissue revealed the lowest number (n =  
265 126) of DEGs during spring (Table 2, S11 and S14 Tables). In comparisons involving  
266 spring samples, the highest numbers of DEGs were found in prescapular adipose  
267 tissue.

268 Four genes, *FIBP*, *CREB3L3*, *CLDN4*, and *ALKBH3*, were exclusively  
269 upregulated in the Finnish reindeer irrespective of the seasons. *FIBP* (*FGF1*  
270 *Intracellular Binding Protein*) is known to promote mitogenic action to induce  
271 morphogenesis and differentiation. *CREB3L3* has been linked to triglyceride  
272 metabolism and growth suppression. *CLDN4* (Claudin 4) is a member of the claudin  
273 gene family. Being integral membrane proteins, claudins, in general, have a vital role  
274 in regulating the transport of solutes and ions through calcium-independent  
275 cell-adhesion activity.

276 Similarly, *TMEM182*, *AACS*, *FAM159B*, and *C19ORF80* were always  
277 upregulated in all five comparisons except between EM-S vs FM-S. Among the four  
278 genes, we did not find any relevant information about the function of *FAM159B*.  
279 There is relatively little information available on *TMEM182*, but its upregulation may  
280 be associated with adipose growth and remodelling [33,34]. In the present context, a  
281 greater abundance of *TMEM182* in Even reindeer males might be linked to  
282 castration, as castrated males are known to accumulate more adipose tissues.  
283 *AACS* (*Acetoacetyl-CoA Synthetase*) appears to be involved in ketone body  
284 metabolism during adipose tissue development. *C19ORF80* (alternatively  
285 *ANGPTL8*, *Angiopietin-like 8*) is known to mediate the transition between fasting

286 and re-feeding and has an important role in the storage of fatty acids in adipose  
287 tissue during the refeeding state [35]. Interestingly, *C19ORF80* was downregulated  
288 in Even reindeer compared to Finnish reindeer among spring samples. We  
289 speculate that the additional winter feeding for the Finnish reindeer might have a role  
290 in the differential expression of *C19ORF80*.

291 **Table 3.** The number of significantly identified DEGs in the metacarpal (M),  
292 perirenal (P), and prescapular (S) adipose tissues of Finnish (F) and Even (E)  
293 reindeer that were compared separately for spring (-S) and winter (-W) samples.

| Comparison   | Total DEGs | Upregulated | Downregulated |
|--------------|------------|-------------|---------------|
| EM-S vs FM-S | 126        | 78          | 48            |
| EP-S vs FP-S | 301        | 189         | 112           |
| ES-S vs FS-S | 385        | 229         | 156           |
| EM-W vs FM-W | 504        | 336         | 168           |
| EP-W vs FP-W | 401        | 182         | 219           |
| ES-W vs FS-W | 365        | 154         | 221           |

294

295 **Gender difference in gene expression.** Our comparison of gene expression  
296 between female and male Even reindeer samples collected during winter revealed a  
297 total of 327 significant DEGs in the three adipose tissues (S17-S19 Tables).

298

299

300 **Table 4.** Summary of DEGS from male (-M) and female (-F) comparisons in  
301 metacarpal (M), perirenal (P), and prescapular (S) adipose tissues of Even (E)  
302 reindeer.

| Comparison   | Total DEGs | Upregulated | Downregulated |
|--------------|------------|-------------|---------------|
| EM-F vs EM-M | 225        | 78          | 147           |
| EP-F vs EP-M | 104        | 54          | 50            |
| ES-F vs ES-M | 49         | 27          | 22            |

303

304 We identified a total of 225 significant DEGs between female and male reindeer  
305 in metacarpal tissue (EM-F vs. EM-M) (Table 4 and S17 Table). Of 225 significant  
306 DEGs, 78 genes were upregulated, and 147 genes were downregulated in EM-F  
307 (Table 4 and S17 Table). The upregulated genes in female samples included  
308 *ANGPTL1*, *CX3CR1*, *CYP2B11*, *CYP2F3*, *CYP4B1*, *FABP6*, *ELOVL7*, *IGHV3-6*,  
309 *SLC19A3*, *SLC35F1* and *SLC6A17*, whereas genes such as *BMP1*, *BMP*, *IBSP*,  
310 *EFS*, *CCL19*, *IGDCC4*, *IL17RB*, *NAV3*, *NCAM1*, *NRL*, *OLFML2B*, *OLFML3*,  
311 *PRDM9*, *SCUBE1* and *FLT4* were downregulated.

312 In perirenal tissue, 104 significantly DEGs were detected between female and  
313 male reindeer, of which 54 and 50 genes were upregulated and downregulated in  
314 EP-F, respectively (Table 4 and S18 Table). The upregulated genes in female  
315 samples included *ABCG1*, *ACSL6*, *SLC14A1*, *SLC16A2*, *SLC4A10*, *SLC9A2*,  
316 *ZNF219*, *PLCD3*, *PTER*, *PLA2G5*, *ETNPPL*, *PLCD3*, *S1PR3*, and *S1PR3*, while  
317 *ATP5H*, *CCL3*, *COX7A1*, *CXCL9*, *NMB*, *NRL*, *PRDM9*, *SLC19A1*, *SLC22A5*, *ZFX*,  
318 and *ZRSR2* were downregulated.

319 Furthermore, 49 significantly DEGs were detected between female and male  
320 reindeer in prescapular tissue (ES-F vs. ES-M), of which 27 and 22 genes were  
321 upregulated and downregulated in ES-F, respectively (Table 4 and S19 Table).

322 *GYS2, ARHGEF5, ABCC4, SUMO1, RPL39, SLC4A10*, and *ACSL6* were examples  
323 of upregulated genes in female samples, and genes such as *TXLNG, DDX3Y,*  
324 *USP9X, EIF2S3X, PRDM9, KDM6A, ZRSR2*, and *UCP1* were downregulated.

325 A total of 10 genes (*PRDM9, DDX3Y, ZRSR2, EIF2S3X, KDM6A, ZFX, UBA1,*  
326 *USP9X, TXLNG*, and *NRL*) were always upregulated in males irrespective of the  
327 adipose tissue type. These genes have diverse functions and may be linked to  
328 speciation (*PRDM9*), male infertility or spermatogenic failure (*DDX3Y*), mRNA  
329 splicing (*ZRSR2*), lipid metabolism (*EIF2S3X*), circadian rhythm (*USP9X*), cell cycle  
330 regulation (*TXLNG*), and photoreceptor development/function (*NRL*).

331 We did not find any genes commonly upregulated in all tissues of female  
332 samples; however, two upregulated DEGs (*CPE, RPL34*) were shared by  
333 metacarpal and perirenal adipose tissues, while 12 (*ARHGEF5, SLC4A10, ABCC4,*  
334 *SGCG, HAND1, CPXM2, GYS2, ACSL6, ANK1, NPR3, TBX20*, and *PGR*) were  
335 shared among prescapular and perirenal adipose tissues.

## 336 Results of GO enrichment analyses

337 **Enriched GO terms associated with DEGs resulting from seasonal**  
338 **comparisons: Finnish reindeer.** Enrichment analyses based on significantly  
339 differentially expressed genes revealed several GO (Gene Ontology) terms and  
340 KEGG (Kyoto Encyclopedia of Genes and Genomes) pathways, thus highlighting  
341 the important biological and physiological activities in each tissue. From the 346  
342 significant DEGs between FM-S and FM-W (Table 2 and S5 Table), 112 genes  
343 lacked GO annotations. Separate GO enrichment analyses were performed for the  
344 downregulated (n = 117 with GO annotation) and upregulated (n = 117 with GO  
345 annotation) genes. GO analysis indicated that 16 and 36 GO terms were significantly

346 associated with downregulated and upregulated DEGs, respectively (S20 Table).  
347 Downregulated DEGs were represented in GO terms mainly associated with  
348 immune processes (e.g., “immune system process”, “immune response”) and  
349 stimulus (e.g., “response to stimulus”, “response to chemical”, “chemotaxis”),  
350 whereas upregulated DEGs were represented in terms associated with metabolic  
351 processes (“ATP metabolic process”, “nucleoside metabolic process”,  
352 “single-organism metabolic process”, “carbohydrate derivative metabolic process”),  
353 and transport (e.g., “proton transport”, “hydrogen transport”, “cation transmembrane  
354 transport”) in the metacarpal adipose tissue of Finnish reindeer.

355 In contrast to metacarpal adipose tissue, both the perirenal and prescapular  
356 adipose tissues had downregulated genes represented in a relatively higher number  
357 of GO terms (n = 29, n = 55, respectively; S21 and S22 Tables) than upregulated  
358 genes (n = 16, n = 7, respectively; S21 and S22 Tables). The DEGs upregulated  
359 during spring in Finnish reindeer perirenal adipose tissue were associated with  
360 metabolic (“cellular amide metabolic process”, “organonitrogen compound metabolic  
361 process”) and biosynthetic (“amide biosynthetic process”, “organonitrogen  
362 compound biosynthetic process”) processes, and those upregulated during winter  
363 were associated with signalling (“signalling”, “G-protein coupled receptor signalling  
364 process”, cell communication”, “single organism signalling”, “signal transduction”),  
365 and regulation (“regulation of biological process”, “regulation of cellular process”,  
366 “biological regulation”) related biological processes. Altogether, 35 of 55 GO terms  
367 associated with DEGs upregulated in the prescapular adipose tissue of Finnish  
368 reindeer from winter sampling were categorised under “biological process”, whereas  
369 none of the seven GO terms enriched in upregulated DEGs of spring samples were  
370 categorized under “biological process”. Moreover, GO terms associated with the



371 regulation of several processes (e.g., “regulation of metabolic process,” “regulation  
372 of RNA biosynthetic process,” “regulation of biological process,” “regulation of gene  
373 expression”), response (e.g., “cellular response to organic cyclic compound”,  
374 “response to steroid hormone”, “response to lipid”, “response to hormone”, “cellular  
375 response to stimulus) and transcription activities (e.g., “transcription coactivator  
376 activity” and “transcription cofactor activity”) categorised upregulated DEGs of  
377 Finnish prescapular adipose tissue collected during winter.

378 **Enriched GO terms associated with DEGs resulting from seasonal**  
379 **comparisons: Even reindeer.** The differential expression analysis between EM-S  
380 and EM-W revealed 156 significantly DEGs (Table 2 and S8 Table), of which 55  
381 lacked GO annotations. GO enrichment analysis of the downregulated genes (n = 77  
382 with GO annotations) yielded seven significantly represented GO terms (S23 Table),  
383 including “metalloendopeptidase activity” and “metallopeptidase activity,” whereas  
384 no significantly enriched GO terms were found in the upregulated genes. In Even  
385 reindeer perirenal tissue, of the 103 significantly DEGs in EP-S vs EP-W (Table 2  
386 and S9 Table), 32 genes did not have GO annotations. Gene enrichment analysis of  
387 the upregulated and downregulated DEGs revealed no statistically significantly  
388 represented GO terms. From the list of 176 significantly DEGs between ES-S and  
389 ES-W (Table 2 and S10 Table), 59 genes lacked GO annotation. Gene enrichment  
390 analysis of the upregulated and downregulated DEGs revealed no statistically  
391 significantly represented GO terms.  
392

393 **Enriched GO terms associated with DEGs resulting from location**  
394 **comparison.** DEGs resulting from the comparison of the metacarpal adipose tissue  
395 between Even and Finnish reindeer did not reveal any GO terms. Upregulated  
396 genes in the perirenal adipose tissue of Even reindeer from spring sampling were  
397 associated only with the GO term “cofactor binding,” whereas downregulated genes  
398 were not enriched in any GO terms. Similar comparison of perirenal adipose tissue  
399 from winter sampling revealed eight and 46 GO terms associated with upregulated  
400 and downregulated genes, respectively, in Even reindeer (S24 Table).

401 In spring prescapular adipose tissues of Even reindeer, a total of 19 GO terms  
402 including signalling (e.g., “single organism signalling,” “signal transduction,”  
403 “G-protein coupled receptor signalling pathway”), and response to stimulus  
404 (“response to external stimulus,” “cellular response to stimulus”) were associated  
405 with upregulated genes (S25 Table), while none of the downregulated genes were  
406 enriched in any GO terms. Similar comparison of winter samples in Even reindeer  
407 revealed three overrepresented GO terms (“anion binding”, “cofactor binding” and  
408 “pyridoxal phosphate binding”) and 20 underrepresented GO terms (including six  
409 signalling terms, “G-protein coupled receptor activity”, “receptor activity” and “cell  
410 communication”) (S26 Table).

411

412 **Enriched GO terms associated with DEGs resulting from gender comparison.**

413 From the list of 225 significantly DEGs identified in EM-F versus EM-M comparison  
414 (S17 Table), 59 genes did not have GO annotations. The GO analysis results of the  
415 upregulated (n = 58 with GO annotations) and downregulated (n = 108 with GO

416 annotation) DEGs in female metacarpal tissue revealed one and 31 significantly  
417 represented GO terms, respectively (S27 Table). The upregulated DEGs in female  
418 metacarpal tissue were significantly enriched in only one GO term: “oxidoreductase  
419 activity, acting on paired donors, with incorporation or reduction of molecular  
420 oxygen”. The downregulated DEGs were significantly enriched in 18 biological  
421 processes, 10 molecular functions, and three cellular component categories (S27  
422 Table). Out of the 18 biological processes, nine GO terms were associated with  
423 developmental processes, such as “circulatory system development,”  
424 “cardiovascular system development,” “blood vessel development,” “vasculature  
425 development,” and “anatomical structure development” (S27 Table) Moreover,  
426 downregulated DEGs in female metacarpal tissue were also significantly enriched in  
427 the biological process represented by the GO terms “cell adhesion,” “angiogenesis,”  
428 “blood vessel morphogenesis,” and “anatomical structure formation involved in  
429 morphogenesis” (S27 Table).

430 From the list of 104 significantly DEGs identified in EP-F versus EP-M  
431 comparison (S18 Table), 15 lacked GO annotations. The GO analysis results of the  
432 upregulated (n = 48 with GO annotations) DEGs in female perirenal tissue revealed  
433 six significantly represented cellular component categories, including “plasma  
434 membrane”, “cell periphery”, “plasma membrane part,” and “integral component of  
435 membrane”; no significantly represented GO terms were associated with  
436 downregulated DEGs (n = 41 with GO annotations) (S28Table).

437 From the list of 49 significantly DEGs identified in ES-F vs. ES-M comparison  
438 (S19 Table), seven genes lacked GO annotation. The GO analysis result of the  
439 upregulated (n = 23 with GO annotation) and downregulated (n = 19 with GO  
440 annotation) DEGs in female prescapular tissue revealed three significant  
441 represented molecular function categories and no significantly enriched GO terms,  
442 respectively. The significantly represented GO terms associated with downregulated  
443 DEGs in female reindeer prescapular tissue included “cation binding,” “ion binding,”  
444 and “metal ion binding,” indicating their role in the acquisition of mineral nutrients:  
445 iron, zinc, and calcium.

## 446 Results of KEGG pathway analyses

447 **KEGG pathways associated with seasonal comparisons.** Finnish reindeer. We  
448 performed KEGG pathway analysis using GAGE to identify pathways that were  
449 differentially regulated by season (FM-S vs FM-W). Pathway enrichment analysis  
450 revealed 18 and 5 significantly downregulated and upregulated KEGG pathways,  
451 respectively, in spring metacarpal adipose tissue (S29 Table). Most of the  
452 downregulated pathways were associated with the immune system, environmental  
453 information processing, and signal transduction (S29 Table). Pathways associated  
454 with immune system included “cytokine-cytokine receptor interaction,” “chemokine  
455 signalling pathway,” “Fc gamma R-mediated phagocytosis,” “IL-17 signalling  
456 pathway,” and “T cell receptor signalling pathway” (S29 Table). In addition, the  
457 significantly downregulated pathways in spring metacarpal tissue associated with  
458 environmental information processing and signal transduction included: “TNF  
459 signalling pathway,” “MAPK signalling pathway,” “NF-kappa B signalling pathway,”  
460 “Jak-STAT signalling pathway,” and “ErbB signalling pathway” (S29 Table).

461 Similarly, the significantly upregulated pathways in spring metacarpal tissue  
462 included “ribosome,” “oxidative phosphorylation,” “biosynthesis of secondary  
463 metabolites,” “microbial metabolism in diverse environments,” and “biosynthesis of  
464 antibiotics” (S29 Table).

465

466 KEGG pathway analysis using DEGs of FP-S vs FP-W comparison indicated  
467 that 12 and three pathways were significantly downregulated and upregulated in  
468 spring perirenal tissue, respectively (S30 Table). The downregulated pathways  
469 were mainly associated with environmental information processing and signal  
470 transduction, such as “cAMP signalling pathway,” “cGMP-PKG signalling pathway,”  
471 “Rap1 signalling pathway,” “Hippo signalling pathway,” and “MAPK signalling  
472 pathway” (S30 Table). However, pathways such as “ribosome,” “oxidative  
473 phosphorylation,” and “ribosome biogenesis in eukaryotes” (S30 Table) were  
474 significantly upregulated in spring perirenal tissue.

475

476 KEGG pathway analysis for FS-S versus FS-W DEGs revealed two and nine  
477 significantly upregulated and downregulated KEGG pathways in spring prescapular  
478 tissue, respectively (S31 Table). Pathway analysis showed a significant upregulation  
479 of two pathways, “ribosome” and “complement and coagulation cascades”. The  
480 downregulated pathways were mainly associated with environmental information  
481 processing and signal transduction: “Hippo signalling pathway–fly”, “cAMP signalling  
482 pathway”, “ErbB signalling pathway”, “MAPK signalling pathway”, “Hippo signalling  
483 pathway” and “FoxO signalling pathway”.

484

485 **KEGG pathways associated with seasonal comparisons.** Pathway analysis in  
486 Even reindeer revealed three KEGG pathways significantly upregulated in the  
487 metacarpal adipose tissues collected during spring (“ribosome”, “spliceosome,” and  
488 “ribosome biogenesis in eukaryotes”), whereas no significantly downregulated  
489 pathways were found. Analysis of DEGs from perirenal adipose tissue did not reveal  
490 any KEGG pathways. Pathways such as “complement and coagulation cascades”  
491 and “cytokine-cytokine receptor interaction” were significantly upregulated during  
492 spring in prescapular adipose tissue, while no KEGG pathways were associated with  
493 downregulated genes.

494 **KEGG pathways associated with location comparisons.** DEGs from the  
495 comparison of the metacarpal adipose tissue between Even and Finnish reindeer did  
496 not reveal any KEGG pathways associated with upregulated genes, whereas two  
497 KEGG pathways, “oxidative phosphorylation” and “ribosome,” were associated with  
498 genes downregulated in Even reindeer in spring (S32 Table) and a similar  
499 comparison from winter sampling revealed seven KEGG pathways, such as  
500 “ribosome biogenesis in eukaryotes”, “TNF signalling pathway”, “IL-17 signalling  
501 pathway,” “NF-kappa B signalling pathway,” and “cytokine-cytokine receptor  
502 interaction” associated with downregulated genes (S33 Table).

503 Upregulated genes in the perirenal adipose tissue of Even reindeer from spring  
504 sampling were associated with one KEGG pathway “ribosome,” while  
505 downregulated DEGs were not associated with any of the pathways. Similar  
506 comparison from winter sampling revealed six and 13 KEGG pathways associated  
507 with upregulated and downregulated genes, respectively, in Even reindeer (S34  
508 Table).

509 While no KEGG pathways were associated with upregulated genes in  
510 prescapular adipose tissues from spring samples, two (“ribosome” and “complement  
511 and coagulation cascades”) were linked to the downregulated genes. Similar  
512 comparison in winter samples revealed 14 and one KEGG pathways associated with  
513 upregulated and downregulated genes, respectively, in Even reindeer (S35 Table).

514 **KEGG pathways associated with gender comparisons.** KEGG pathway analysis  
515 revealed no statistically significant enriched KEGG pathways between EM-F and  
516 EM-M. “Ribosome” was the only KEGG pathway associated with DEGs from the  
517 perirenal and prescapular adipose tissues. Interestingly, in both tissues, the  
518 “ribosome” pathway was downregulated in female reindeer.

519

## 520 Physiological analyses

521 **Immunoblotting of UCP1 and COX4.** Immunoblotting on UCP1, a protein specific  
522 to thermogenic adipocytes, was conducted on a cross-section of different adipose  
523 tissues. Immunoreactivity at 32 kDa molecular weight characteristic of UCP1 was  
524 evident, although in small amounts, in the total proteins of prescapular and perirenal  
525 adipose tissues of both Even and Finnish reindeer (Fig 4). In general, prescapular  
526 adipose tissues appeared to have slightly higher UCP1 expression than perirenal  
527 adipose tissues. In Finnish reindeer, the relative expression of UCP1 was  
528 significantly higher in winter compared with spring in both prescapular ( $p = 0.0016^*$ )  
529 and perirenal ( $p = 0.032^*$ ) adipose tissues (Fig 4c, f). The Even reindeer exhibited a

530 similar albeit not statistically significant trend of higher UCP1 expression in winter  
531 compared with spring (Fig 4c, f).

532

533 The expression of COX4, an enzyme central to oxidative phosphorylation, was  
534 undetectable from the adipose tissue total proteins. However, we analyzed its  
535 expression in other metabolically active tissues — the liver and muscle (see  
536 Materials and methods). The relative expression level of COX4 in the liver samples  
537 was significantly higher in Finnish reindeer in winter ( $p = 0.008^{**}$ ) in comparison to  
538 spring (Fig 5). There were no statistically significant differences in muscle COX4  
539 levels between seasons.

540

541 **Blood metabolites.** Plasma leptin levels were at a similar range in Even and Finnish  
542 reindeer in spring, but under the detection limit (1.56 ng/ml) in both male and female  
543 Even reindeer in winter (Fig 6a). Plasma insulin levels of reindeer were at similar  
544 level in both seasons and regions (Fig 6b). Plasma HSL was significantly higher in  
545 winter in Finnish reindeer compared with spring ( $p = 0.016^*$ ), but there were no  
546 significant differences in the Even reindeer between seasons (Fig 6c).

547 Serum glucose, creatinine and triglyceride concentrations were at a similar  
548 range in both Even and Finnish reindeer in both seasons (Figures 6d, e, g). There  
549 was a trend of higher serum urea (Fig 6f) in winter samples compared to spring  
550 samples within the deer of both regions, albeit not statistically significant.

551



## 552 Discussion

553 Adipose tissues are vital for animals living in cold environments, promoting  
554 adaptation by temperature regulation, energy homeostasis, regulation of fat  
555 deposition, and metabolism [5,6,10,11,36–40]. Here, we have investigated gene  
556 expression profiles of adipose tissues from three different anatomical depots in  
557 Finnish and Even reindeer during two seasonal time points. To the best of our  
558 knowledge, this is the first transcriptome study of adipose tissues in reindeer. Our  
559 results indicated a clear difference in gene expression profiles in metacarpal adipose  
560 tissue compared to perirenal and prescapular adipose tissues. We found that during  
561 the less optimal circumstances in early spring, mainly characterized by  
562 undernutrition, genes associated with the immune system were upregulated in  
563 perirenal and prescapular adipose tissues, while genes involved in energy  
564 metabolism were upregulated in metacarpal tissue. Interestingly, developmental,  
565 growth, and adipogenesis processes were downregulated in all three tissues during  
566 spring.

567 RNA-Seq is an efficient method to screen new genes, transcripts, gene  
568 expression, and differentially expressed genes in various organisms, tissues, and  
569 cells [41–43]. In this study, we identified a total of 16,362 expressed genes in focal  
570 adipose tissues, which appeared to cover approximately 60% of the list of genes  
571 available for the reindeer reference genome [3]. The present results revealed an  
572 adequate number of expressed genes in reindeer adipose tissues, which were then  
573 utilized in subsequent gene expression analysis to investigate genes associated with  
574 seasonal (early spring vs. early winter), location (Even reindeer vs. Finnish  
575 reindeer), and gender (male vs. female) differences.

576 In this study, highly abundant genes were associated with fat and lipid  
577 metabolism, thermogenesis, and energy homeostasis that are critical for the survival  
578 of reindeer during seasonal fluctuations. Several of the abundant genes involved in  
579 fat and lipid metabolism, such as *FABP4*, *FABP5*, *MT-CYB* and *ADIPOQ* (S36  
580 Table), were highly expressed in all adipose tissues in both Finnish and Even  
581 reindeer. *Fatty acid binding protein 4 (FABP4)* was the most highly expressed gene  
582 in all adipose tissues in both Finnish and Even reindeer. Three of the top expressed  
583 genes, including *FABP4*, *FABP5*, and *ADIPOQ*, were also found to be highly  
584 expressed in a previous adipose transcriptome profiling study in two fat-tailed sheep  
585 breeds [22]. Moreover, *FABP4* and *FABP5* were also highly expressed in the  
586 perirenal tissue of sheep [44]. Fatty acid binding proteins (FABPs) 4 and 5, encode  
587 the fatty acid binding protein found in adipocytes and epidermal cells, respectively. A  
588 previous study showed that *FABP4* and *FABP5* play an important role in  
589 thermogenesis during cold exposure and starvation [45]. Moreover, previous studies  
590 in cattle have suggested that *FABP4* plays a crucial role in fat deposition, fatty acid  
591 transport, catabolism, and metabolism [22,46,47]. Adiponectin (*ADIPOQ*), secreted  
592 by adipocytes and exclusively expressed in adipose tissues, plays an important role  
593 in modulating the regulation of fatty acid oxidation, glucose levels, and insulin  
594 sensitivity [22,48,49]. The top expressed genes associated with fat metabolism  
595 observed in the present study may play a vital role in energy homeostasis,  
596 thermoregulation, and promoting adaptation of reindeer to the challenging  
597 environment. The blood lipid, glucose, and insulin levels of reindeer support the view  
598 of homeostasis despite challenging conditions.

599 Tissue-wise, the gene expression profiles of metacarpal adipose tissue were  
600 remarkably different from those of prescapular and perirenal adipose tissues. The  
601 highest number of tissue-specific genes were found in metacarpal adipose tissue

602 (Fig 1). Similarly, the PCA plot based on all expressed genes revealed a cluster for  
603 metacarpal adipose tissue, which was distinct from the samples representing other  
604 tissues (Fig 2). We found that several genes from the homeobox (HOX) family of  
605 proteins were uniquely expressed in metacarpal adipose tissue. These genes are  
606 known to play important roles in the differentiation of adipocytes [50]. Furthermore,  
607 several genes associated with cytokines and immune response appeared to be  
608 downregulated in the metacarpal tissue during spring (S5 and S8 Table). By  
609 contrast, DEGs associated with cytokines and immune response were upregulated  
610 in the perirenal and prescapular tissues during spring (S6, S7, S9 and S10 Tables).  
611 Hence, these results indicate the unique biological functions of the metacarpal tissue  
612 compared to the other two tissues.

613 The distinctiveness of the metacarpal adipose tissue may be due to its local  
614 niche functions in bone marrow, although it also contributes to systemic metabolism  
615 [14,16]. Bone marrow adipose tissue has many properties in common with white  
616 adipose tissue, but it is an adipose type of its own that is currently being actively  
617 studied [14,16]. In addition to its role as a local energy reservoir and its contribution  
618 to haematopoiesis and osteogenesis [15], metacarpal adipose tissue also secretes  
619 a variety of hormones and proteins, such as adiponectin and leptin, which have an  
620 important function in the regulation of energy metabolism [16]. The metabolic profile  
621 of metacarpal adipose tissue is composed of both white and brown fat, indicating its  
622 plasticity in performing different functions [16].

623 We observed more seasonal differences in the number of DEGs in the adipose  
624 tissues of Finnish reindeer (n = 1229) compared to Even reindeer (n = 386, also see  
625 Table 2). The Finnish reindeer specifically exhibited several significant DEGs  
626 associated with ATPase and ATP synthase, whereas no ATP-related genes were  
627 detected in Even reindeer. The significant DEGs associated with ATPase and ATP

628 synthase identified in Finnish reindeer include *ATP12A*, *ATP5L*, *ATP50*,  
629 *ATP6AP1L* and *ATP8* in metacarpal, *ATP1A2*, *ATP1B2*, *ATP6V0C*, *ATP7A* and  
630 *ATP8* in perirenal, and *ATP1A2*, *ATP1B2*, *ATP7A*, *ATP8B1*, *ATP8B3* and *ATP8* in  
631 prescapular adipose tissue. A previous study on zebrafish (*Danio rerio*) reported  
632 that feeding altered the expression of ATP-related genes [51]. The differences  
633 between Even and Finnish reindeer could be due to the influence of management  
634 (extra feeding in Finland *versus* no additional feeding in Yakutia), vegetation  
635 (relatively sparser in Yakutia), and temperature (relatively warmer in Finland). A  
636 further possible explanation for the high expression of ATP genes in Finnish  
637 reindeer is that they were fed concentrates with a high protein content (~10%  
638 protein content) compared to their natural winter food, lichens (2–3% protein  
639 content).

640 In terms of seasonal comparison, we observed that the gene expression  
641 profiles of metacarpal tissue were mainly enriched for energy metabolism instead of  
642 their typical role in immune systems. Adipose tissue has been previously reported  
643 to play a role in immune and inflammatory systems [52,53]. Earlier studies reported  
644 that adipocytes of both peripheral and bone marrow fat secrete a variety of  
645 hormones and proteins, such as pro-inflammatory and anti-inflammatory cytokines  
646 [54–56]. However, in the present Even reindeer metacarpal tissue, the  
647 downregulated genes in spring included genes associated with cytokines, such as  
648 *CCL19*, *IGDCC4*, *IL17RB*, *JCHAIN*, *LECT1* and *IGLV1-51*. Moreover, several of the  
649 downregulated DEGs in spring in Finnish and Even reindeer metacarpal adipose  
650 tissues revealed genes associated with immune system. On the other hand, the  
651 upregulated DEGs in spring in Finnish and Even reindeer metacarpal adipose  
652 tissue revealed genes associated with lipid and energy metabolism, supporting the  
653 view that bone marrow fat acts as a source of energy when reindeer are in poor

654 condition [18,19]. In reindeer, the proportions of unsaturated fatty acids, oleic, and  
655 linoleic acid are significantly decreased in metatarsal bone marrow fat in poor  
656 conditions in spring [19]. This may be related to their use for oxidation or other,  
657 synthetic processes. For instance, angiopoietin-like protein 8 (*ANGPTL8*) and  
658 angiopoietin-like protein 1 (*ANGPTL1*) were among the upregulated genes detected  
659 in the metacarpal tissue of Finnish and Even reindeer, respectively, in spring.  
660 *ANGPTL8* is a member of the angiopoietin-like protein (*ANGPTL*) family involved in  
661 the metabolic transition from fasting to re-feeding and plays a key role in lipid  
662 metabolism [57–59]. Depending on the location in the body, adipose tissues differ in  
663 terms of cellular composition, quantity, and proportion of adipocytes, and their  
664 capacity to produce adipocytokines [9]. During starvation, adipose tissue often limits  
665 the cytokine levels to reduce the consumption of resource/energy by the immune  
666 systems to actively decrease energy usage; subsequently, the activity of immune  
667 cells is limited [60–62]. Reindeer in both locations, and particularly Even reindeer,  
668 are in their poorest nutritional condition during spring. In this study, all cytokine  
669 genes identified in the metacarpal tissue were downregulated in spring. This might  
670 be due to the metacarpal adipose tissue being exclusively involved in  
671 thermogenesis and energy metabolism by suppressing the function of the immune  
672 system. Hence, when these reindeer experience the worst conditions during spring,  
673 the stored fat depots from metacarpal adipose tissues may be exclusively reserved  
674 for energy usage.

675 As revealed by the top downregulated genes in the perirenal and prescapular  
676 adipose tissues of Finnish reindeer and in all three adipose tissues of Even reindeer,  
677 biological processes associated with development, cell growth, and organogenesis  
678 were repressed during spring. The downregulation of genes involved in  
679 organogenesis, cell growth, and development in spring may indicate that the animals

680 give less priority for growth- and development-related processes during extreme  
681 conditions; thus, the animals spend no extra energy for growth related processes. As  
682 mentioned above, during extreme conditions, the animals reduce several metabolic  
683 activities to increase the efficiency of energy usage.

684 Furthermore, gene expression analysis of gender differences in even reindeer  
685 adipose tissues indicated that genes associated with fatty acid metabolism and  
686 male sterility were upregulated in female and male reindeer, respectively. The  
687 upregulated genes associated with fatty acid metabolism in females include *ELOVL7*  
688 and *FABP6* in metacarpal, *ABCG1*, *ACSL6*, *PLCD3*, and *PLA2G5* in perirenal  
689 tissue, and *ACSL6* and *PLA2R1* in prescapular tissue. This result is consistent with  
690 previous studies in humans and mice [63,64], which suggested that females show  
691 higher levels of fat deposition than males. By contrast, the upregulated genes in  
692 male reindeer revealed 10 shared genes among the three tissues, such as *UBA1*,  
693 *TXLNG*, *PRDM9*, *EIF2S3X*, *NRL*, *DDX3Y*, *KDM6A*, *ZRSR2*, *USP9X* and *ZFX*. Six  
694 of these genes, *PRDM9* [65,66], *UBA1* [67], *EIF2S3X* [68,69], *DDX3Y* [70–72],  
695 *ZRSR2* [57], and *USP9X* [74], have been shown to be associated with male sterility.  
696 Moreover, it should be noted that the reindeer reference genome lacked gene  
697 annotations for the Y chromosome, and that many of the Y chromosome-specific  
698 RNA-Seq reads may have aligned to the paralog genes of the X chromosome.

699 We also analyzed adipose *UCP1* and *COX4* protein levels as indicators of the  
700 potential thermogenesis and metabolic state of the reindeer. We anticipated that  
701 adipose tissues of the adult reindeer are white adipose tissue but may potentially  
702 have some brown adipose tissue characteristics, considering the extreme long-term  
703 exposure of the reindeer to cold, especially in Siberia. There is no previous  
704 evidence of BAT or ‘browning’ of adipose tissues in adult reindeer, but it is well

705 established that new-born reindeer have active BAT at birth and during their first  
706 month of life [10,11].

707 Our results show the presence of *UCP1* protein in two different adipose tissues of  
708 adult reindeer, prescapular, and perirenal depots (Fig 4). Relative *UCP1* expression  
709 was significantly higher in winter compared with spring in Finnish reindeer in both  
710 prescapular and perirenal adipose tissues, likely reflecting colder weather  
711 conditions in winter. A similar trend was observed in the Even reindeer. Due to the  
712 low amount of protein, it is likely that *UCP1* does not have major thermogenic  
713 relevance. However, the findings are still interesting, as they show that *UCP1* was  
714 present in the white adipose tissues of adult reindeer. They also refer to plasticity of  
715 adipose tissue, that is, the potential to adjust its functions according to prevailing  
716 conditions [75]. In general, reindeer can cope with very low ambient temperatures in  
717 winter (-30°C) without increasing their heat production [76], and thus non-shivering  
718 thermogenesis is usually not necessary. This is mainly due to the good insulation  
719 capacity of the winter coat of reindeer, which effectively prevents heat loss. Liver  
720 *COX4* expression was significantly higher in Finnish reindeer in winter as compared  
721 to spring, and a similar trend was apparent in Even reindeer (Fig 5). This indicates  
722 an increase of oxidative phosphorylation and ATP synthesis in the liver to match the  
723 increased energy demands caused by the colder season.

724 Plasma leptin and insulin levels were low (Fig 6) and agree with earlier findings  
725 in reindeer [5]. Leptin is a hormone secreted by adipose tissues and plays a role in  
726 the regulation of body weight [77]. The low leptin levels suggest that the adipose

727 tissues of reindeer were small and that the animals were striving to preserve their  
728 adipose tissues. Low leptin also agrees with adipose transcriptomics results  
729 referring to fat mobilization. Plasma hormone-sensitive lipase (HSL) was  
730 significantly higher in Finnish reindeer in the early winter than in the spring group,  
731 suggesting the mobilization of storage lipids to accommodate increased energy  
732 expenditure of male reindeer related to the breeding season.

733 Serum glucose, triglyceride, creatinine, and urea concentrations were similar  
734 between seasons (Fig 6), indicating that the harsh winter season is relatively well  
735 tolerated by the reindeer without severe muscle catabolism, which would be  
736 indicated by changes in the blood parameters.

737

## 738 **Conclusions**

739 Collectively, our mRNA-Seq data uncovered variations in the transcriptome  
740 profiles of three adipose tissues in relation to seasonality, location, and gender  
741 differences. In general, our study showed that highly expressed genes in adipose  
742 tissues were associated with fat and lipid metabolism and thermal and energy  
743 homeostasis, promoting the adaptation of reindeer to challenging Northern Eurasian  
744 environments. Further, our results indicated a distinct gene expression profile in  
745 metacarpal adipose tissue compared to perirenal and prescapular adipose tissues.  
746 Metacarpal adipose tissue appeared to have a greater role in metabolic activities  
747 compared to the other two tissues especially during spring when the animals are  
748 experiencing the worst nutritional conditions. Moreover, reindeer from Finland and  
749 Yakutia displayed different gene expression profiles, in part owing to climatic and



750 management differences. Thermogenic UCP1 protein was present in adipose  
751 tissues of both Even and Finnish reindeer, although in low amounts, showing that the  
752 reindeer have an option for extra heat production and thermal and energy  
753 homeostasis if needed. Taken together, the results and resources from this study  
754 will be useful for elucidating the genetics and physiology of adipose tissue for  
755 adaption to northern Eurasian conditions.

## 756 **Materials and Methods**

### 757 **Sample collection for transcriptome analysis**

758 This study includes RNA-Seq of 56 tissue samples from 19 reindeer individuals  
759 (three adult females and 16 adult males) that were randomly collected at slaughter  
760 from two different geographical regions (Inari, northern Finland and Eveno-Bytantay,  
761 Sakha, Yakutia, the Russian Federation) at two seasonal time points: winter  
762 (November–December) and spring (April) (Table 1 and S1 Table). Perirenal samples  
763 were taken from the adipose tissue around the kidneys, prescapular samples from  
764 the adipose tissue located beneath the cervical muscles in front of the scapula, and  
765 metacarpal samples from the bone marrow in the diaphysis of the metacarpal bone  
766 (left front leg). For convenience, throughout the text, the sample groups are  
767 abbreviated using reindeer location (F, E), tissue type (P, S, M), and seasonal time  
768 points (S, W). For example, FM-S represents the metacarpal tissue of Finnish  
769 reindeer collected during spring. The samples were stored in RNeasy Lysis Solution  
770 (Ambion/QIAGEN, Valencia, CA, USA). It should be noted that three male reindeer  
771 (spring) from Yakutia were castrated, whereas those from Finland (n = 10) and  
772 autumn Yakutian males (n = 3) were uncastrated. The animals grazed on natural

773 pastures throughout the year before the sampling. However, the Finnish reindeer  
774 were fed concentrates (Poroherkku, Raisio, Finland) for 2–8 weeks in February and  
775 March 2016 and kept in feeding pens prior to slaughter. The animals were exposed  
776 to seasonal ambient temperatures and photoperiod. The mean daily temperature in  
777 Inari, Finland varied between -16.1°C and 5.2°C before the sampling in winter (14  
778 hours light, 10 hours dark) and between -13.2°C and 4°C before the sampling in  
779 spring (16 hours light, 8 hours dark). In northern Sakha, the daily temperature varied  
780 between -13°C and -24°C during the winter sampling (6.5 hours daylight, 17.5 hours  
781 dark) and between -9°C and - 0°C during the spring sampling (14 hours of daylight,  
782 10 hours dark). Serum and plasma samples were also collected from Sodankylä,  
783 Finland in the spring (15 hours light, 9 hours dark), where the mean daily  
784 temperatures varied between -11.4°C and 3.7°C. All protocols and sample collections  
785 were performed in accordance with the legislations approved by the Russian  
786 authorization board (FS/UVN 03/163733/07.04.2016) and the Animal Experiment  
787 Board in Finland (ESAVI/7034/04.10.07.2015).

788

789 **Table 1.** Summary of adipose tissue samples used for RNA-seq and physiological  
790 studies (the latter in brackets). Blood samples were collected from all the animals  
791 and two additional male Finnish reindeer in spring.

|            | Finnish reindeer |        | Even reindeer |        |        |
|------------|------------------|--------|---------------|--------|--------|
|            | Spring           | Winter | Spring        | Winter |        |
|            | male             | male   | male*         | male   | female |
| Metacarpal | 5                | 5      | 3             | 3      | 3      |
| Perirenal  | 4 (4-5)          | 5 (5)  | 3 (3)         | 3 (3)  | 3      |

|             |       |       |       |       |   |
|-------------|-------|-------|-------|-------|---|
| Prescapular | 5 (5) | 5 (5) | 3 (3) | 3 (3) | 3 |
|-------------|-------|-------|-------|-------|---|

792 \*Castrated males (Spring samples)

## 793 Sample collection for physiological analysis

794 Blood samples were taken before slaughter by a jugular venipuncture into  
795 vacuum serum and EDTA K3 tubes. The blood samples were centrifuged, and the  
796 separated serum and plasma were stored at -80°C until analysis. A total of 18 males,  
797 Finnish (n = 12) and Even (n = 6) reindeer, were examined, of which 16 were  
798 included in the RNA-seq analysis (see S1 Table). The aforementioned adipose  
799 tissues as well as additional liver and muscle (*M. gluteobiceps femoris*) samples  
800 were stored in RNeasy lysis solution and then used for immunoblotting analysis. We  
801 used RNeasy lysis solution for preservation instead of liquid nitrogen due to the long storage of  
802 the samples in field conditions. The use of RNeasy lysis solution was validated by testing both  
803 RNeasy lysis solution and liquid nitrogen-preserved samples from western blotting (data not  
804 shown here).

## 805 RNA extraction, library preparation, and sequencing

806 RNA extraction, library preparation, and sequencing were performed at The  
807 Finnish Functional Genomic Center (FFGC), Turku, Finland. Total RNA was  
808 extracted from adipose tissues (ca <30mg/sample) using the Qiagen AllPrep  
809 DNA/RNA/miRNA kit according to the manufacturer's protocol. The quality of the  
810 obtained RNA was ensured with an Agilent Bioanalyzer 2100 (Agilent Technologies,  
811 Waldbronn, Germany), and the concentration of each sample was measured with a  
812 Nanodrop ND-2000 (Thermo Scientific; Wilmington, USA) and a Qbit(R)

813 Fluorometric Quantification, Life Technologies. All samples revealed an RNA  
814 integrity number (RIN) above 7.5.

815 Library preparation was done according to Illumina TruSeq® Stranded mRNA  
816 Sample Preparation Guide (part #15031047). Unique Illumina TruSeq indexing  
817 adapters were ligated to each sample to pool several samples later in one flow cell  
818 lane. Library quality was inferred with an Advanced Analytical Fragment Analyzer  
819 and concentration with a Qubit fluorometer, and only good-quality libraries were  
820 sequenced.

821 The samples were normalized and pooled for automated cluster preparation,  
822 which was carried out with Illumina cBot station. Libraries prepared for sample  
823 YR1\_SCAP\_322D and FR12\_SCAP\_402D (S1 Table) were pooled together and run  
824 in one lane to generate a deep sequence to detect long non-coding RNAs (lncRNAs)  
825 for a future study. The remaining 61 libraries were combined in one pool and run on  
826 seven lanes of an Illumina HiSeq 3000 platform. Paired-end sequencing with 2 × 75  
827 bp read length was used with a 8 + 8 bp dual index run. Two samples  
828 (FR9\_SCAP\_369D and FR13\_PREN\_425C) (S1 Table) suffering from pooling error  
829 and low amounts of reads and were therefore resequenced in an extra lane. Base  
830 calling and adapter trimming were performed using Illumina's standard bcl2fastq2  
831 software.

## 832 Bioinformatics analyses

833 The overall quality of the raw RNA-seq reads in fastq and aligned reads in BAM  
834 format were assessed using FastQC software v0.11.7 [78]. FastQC reports were  
835 summarized using MultiQC v1.7 [79]. High quality RNA-seq reads for each sample  
836 were mapped against the reindeer draft assembly [3] using Spliced Transcripts

837 Alignment to a Reference (STAR) (version 2.6.0a) [80] with default parameters. We  
838 next generated read counts from the aligned files using the featureCounts software  
839 (version 1.6.1) from the Subread package [81] to assign reads to genes. The  
840 GTF-format annotation file associated with the reindeer draft assembly was used for  
841 gene coordinate information.

842 To examine the shared and uniquely expressed genes across the three adipose  
843 tissues, we used the cpm function from the edgeR library [82] to generate  
844 count-per-million (CPM) values; lowly expressed transcripts with a CPM < 0.5 were  
845 discarded.

846 Adipose transcriptomes are affected by the type of adipose as well as by the sex  
847 of the animal [31]. We also hypothesized that there could be differences in seasonal  
848 gene expression profiles due to changes in ambient temperature and other climatic  
849 factors and subsequent changes in body condition. Hence, we conducted differential  
850 gene expression analysis between the spring and winter sampling for each tissue  
851 and region using only male reindeer samples. In addition, we compared gene  
852 expression in samples collected from female and male Even reindeer in winter.  
853 Furthermore, to explore regional (and population) differences in gene expression,  
854 we compared expression in each tissue between E and F male reindeer. In our  
855 study, the analyzed group of animals for each tissue included at least three animals  
856 from each geographical region and season (Table 1 and S1 Table)

857 Raw read counts were processed using the R Bioconductor package DESeq2  
858 [83] to perform differential gene expression and related quality control analysis. Prior  
859 to running DESeq2, lowly expressed (rowSums < 1) genes were discarded. Raw  
860 gene expression counts were normalized for differences in library size and  
861 sequencing depth using DESeq2, to enable gene expression comparisons across  
862 samples. We performed principal component analysis (PCA) to assess sample

863 similarity using the variance stabilizing transformation (VST) method. In this study,  
864 we used fold-change and false discovery rate (FDR) filtering criteria to identify  
865 significantly differentially expressed genes (DEGs). We set absolute value of  
866 log<sub>2</sub>-fold change (LFC) to be greater than or equal to 1.5 ( $|\log_2\text{FoldChange}| > 1.5$ )  
867 and an adjusted p-value of 0.05 ( $p_{adj} < 0.05$ ) to screen for significant DEGs. The  
868 Benjamini-Hochberg FDR method was used to calculate adjusted p-values.

869 To gain insight into the biological functions and relevance of the identified DEGs,  
870 a functional enrichment analysis was conducted using AgriGO v2.0 [84]. In the  
871 AgriGO analysis toolkit, to detect the significantly enriched GO terms, default  
872 parameters were used in the “Advanced options”: Fisher as the statistical test  
873 method, Yekutieli for multiple test correction at a significance level threshold 0.05  
874 (FDR < 0.05), and minimum number of mapping entries 5. In this analysis, the GO  
875 annotation file from the *de novo* assembled reindeer genome [3] was used as a  
876 background reference. Furthermore, to explore the biological pathways associated  
877 with the DEGs, we performed Kyoto Encyclopaedia of Genes and Genomes (KEGG)  
878 pathway analysis using the GAGE [85] Bioconductor package. The significantly  
879 enriched pathways were identified based on the q-values obtained from a Fisher’s  
880 exact test ( $q\text{-value} < 0.1$ ).

## 881 Physiological analyses

882 **Immunoblotting analysis of proteins.** Adipose tissue samples were homogenized  
883 and dissolved in lysis buffer (25 mM Tris [pH 7.4], 0.1 mM EDTA, 1 mM DTT,  
884 15µl/ml protease inhibitor cocktail (Sigma, St Luis, MO, USA) to extract total protein  
885 content. Insoluble material was removed from the extracts by centrifugation (13,000  
886 g, 10 min, +4°C). Mitochondrial proteins were extracted from reindeer muscle, liver,  
887 reindeer calf prescapular brown adipose tissue (BAT), and mouse BAT samples as  
888 described previously [86]. Both total and mitochondrial protein concentrations were  
889 determined using the Bradford method (Bio-Rad protein assay, Bio-Rad  
890 Laboratories GmbH, München, Germany). Protein extract volumes equivalent to  
891 50–75 µg of total protein were concentrated into smaller volumes by lyophilizing the  
892 samples with a Savant Speed Vac Plus SC210A centrifugal evaporator (Thermo  
893 Fisher Scientific, Rockford, USA) in cooled conditions for 1 hour. Due to the low  
894 number of mitochondria in adipose tissue, total protein extractions were used for the  
895 immunoblotting of UCP1.

896 The proteins were separated electrophoretically using a 4–12% gradient gel  
897 and transferred to a nitrocellulose membrane (Bio-Rad, Trans-Blot® Transfer  
898 Medium, Pure Nitrocellulose Membrane [0.2 µm], Bio-Rad Laboratories, Hercules,  
899 CA, USA). The membranes were incubated overnight with UCP1 antibody and  
900 loading control protein alpha tubulin antibody for the total protein adipose tissue  
901 samples (1:1.000 UCP1 Polyclonal Antibody, cat no. PA1-24894, 1:500 alpha  
902 Tubulin Polyclonal Antibody, cat no. PA5-16891, Invitrogen, Thermo Fisher  
903 Scientific, Rockford, USA). Membranes with liver and muscle mitochondrial protein

904 samples were incubated overnight with COX4 antibody (1:1.000 COX4 Polyclonal  
905 Antibody, cat no. PA5-17511, Thermo Fisher Scientific, Rockford, USA) and loading  
906 control protein ATP5A antibody (1:1.000 anti-ATP5A antibody, cat no. ab151229,  
907 Abcam, Cambridge, UK). After the primary antibody treatments, the membranes  
908 were incubated with a secondary antibody (1:25.000, Goat anti-Rabbit IgG (H+L)  
909 horseradish peroxidase conjugate, cat no. 31460, Invitrogen, Thermo Fisher  
910 Scientific, Rockford, USA) for 1 hour. Chemiluminescence for UCP1 and COX4 was  
911 detected with SuperSignal West Femto Maximum Sensitivity Substrate (cat no.  
912 34095, Thermo Fisher Scientific, Rockford, USA) according to the manufacturer's  
913 instructions. Blots were visualized with Odyssey® Fc imaging system (LI-COR  
914 Biosciences, Ltd, Cambridge, UK). Positive immunoreactivity for UCP1 with mouse  
915 BAT mitochondria and with prescapular BAT mitochondria from newborn reindeer  
916 were used as reference samples. Results were normalized with the loading control  
917 optical density for alpha tubulin and ATP5A for UCP1 and COX4, respectively.

918 **Blood metabolites.** Plasma leptin concentration was assayed using a multispecies  
919 leptin RIA kit (Cat#XL-85K, Millipore, Billerica, Massachusetts, USA). The validity  
920 test for reindeer showed a linear correlation between the label and sample  
921 concentration. A sensitive bovine, ovine, rat, and mouse insulin RIA kit  
922 (Cat#SRI-13K, Millipore, Billerica, Massachusetts, USA) was used to measure  
923 plasma insulin. Plasma hormone-sensitive lipase levels (HSL) were estimated by  
924 bovine hormone sensitive ELISA Kit (Cat#MBS033124, MyBioSource, San Diego,  
925 CA, USA). Serum glucose, triglyceride, creatinine, and urea concentrations were  
926 determined with enzymatic colorimetric analyses in NordLab, Oulu, Finland.

927 **Statistical analyses for immunoblotting and blood metabolite analyses.**

928 Statistical analysis for the multiple comparisons was performed with an



929 independent-samples Kruskal-Wallis test followed by an independent samples  
930 Mann-Whitney U-test. Significance values were adjusted with the Bonferroni  
931 correction for multiple tests. Statistical analyses were performed using the IBM  
932 SPSS Statistics 21 Data Editor software (IBM, Armonk, NY, USA). P-values below  
933 0.05 were considered statistically significant. The results of the relative peptide  
934 expressions are presented as the mean  $\pm$  SD.

### 935 **Figure captions**

936 **Fig 1. Venn diagram showing overlap of expressed genes (CPM  $\geq$  0.5 for at**  
937 **least two samples) among tissues in each region and season.** Shared and  
938 uniquely expressed genes across tissues (M, P, and S) in (A) Finnish reindeer in the  
939 summer, (B) Finnish reindeer in the winter, (C) Even reindeer in the summer, and (D)  
940 Even reindeer in the winter.

941 **Fig 2. PCA plots of the analyzed samples based on expression profiles,**  
942 **with dot colours indicating tissue and region (see legend).**

943 **Fig 3. Distribution of uniquely expressed genes in the metacarpal adipose**  
944 **tissue of Finnish (FM-W, FM-S) and Even (EM-W, EM-S) reindeer.**

945 **Fig 4. The western blots and relative expression of UCP1 from (a–c) reindeer**  
946 **prescapular and (d–f) perirenal adipose tissue total proteins.** The upper blots  
947 on the left side show UCP1 content in prescapular adipose tissue (a) in spring in  
948 Even reindeer (n = 3) and Finnish reindeer (n = 5), (b) in winter in Even reindeer (n  
949 = 3) and Finnish reindeer (n = 5), and the lower graph shows (c) their relative

950 expressions. The upper blots on the right side show UCP1 content in perirenal  
951 adipose tissue (d) in spring in Even reindeer (n = 3) and Finnish reindeer (n = 4), (e)  
952 in spring in Even reindeer (n = 3) and Finnish reindeer (n = 4), and the lower graph  
953 shows (f) their relative expressions. Samples contained 50 µg of total protein per  
954 lane, except the reindeer BAT (brown adipose tissue; BAT and BATr) samples with  
955 5 µg and mouse BAT (BATm) with 1 µg of protein. Alpha tubulin was used as a  
956 loading control. The relative expression of UCP1 was normalized to alpha tubulin  
957 and presented as mean arbitrary units (a.u.) ± SD c,f). Significant differences  
958 between seasons are indicated with a bar and an asterisk (\*P < 0.05).

959 **Fig 5. The western blots and relative expression of COX4 from (a–c) reindeer**  
960 **muscle (*M. gluteobiceps femoris*) and (d–f) liver mitochondrial proteins.** The  
961 upper blots on the left side show COX4 content in muscle (a) in spring in Even  
962 reindeer (n = 3) and Finnish reindeer (n = 5), (b) in winter in Even reindeer (n = 3)  
963 and Finnish reindeer (n = 5), and the lower graph shows (c) their relative  
964 expressions. The upper blots on the right side show COX4 in liver (d) in spring in  
965 Even reindeer (n = 3) and Finnish reindeer (n = 5), e) in winter in Even reindeer (n =  
966 3) and Finnish reindeer (n = 5), and the lower graph shows (f) their relative  
967 expressions. Samples contained 10 µg of mitochondrial protein per lane, except the  
968 reindeer BAT (brown adipose tissue) sample with 1 µg of mitochondrial protein.  
969 Mitochondrial ATP synthase (ATP5A) was used as a loading control. The relative  
970 expression of COX4 was normalized to ATP5A and presented as mean arbitrary

971 units (a.u.)  $\pm$  SD c,f). Significant difference between seasons is indicated with a bar  
972 and an asterisk (\*\*P  $\leq$  0.01).

973 **Fig 6. Plasma hormone and serum metabolite levels in Finnish male reindeer**  
974 **in winter and spring (n = 7), in male Even reindeer in winter and spring (n=3),**  
975 **and in Even female (F) reindeer in winter (n = 3).** Plasma hormones (a) leptin, (b)  
976 insulin, (c) hormone sensitive lipase (HSL) and serum metabolites (d) glucose, (e)  
977 creatinine, (f) urea, and (g) triglyceride levels are presented as mean  $\pm$  SD.  
978 Significant difference between seasons is indicated with a bar and an asterisk (\*\*P  $\leq$   
979 0.01).

980

## 981 **Supporting information**

982 **S1 Fig.** PCA plot based on the region for each tissue. (A) metacarpal, (B) perirenal,  
983 and (C) prescapular.

984 **S2 Fig.** Heatmap plot of the top 25 genes with the highest genetic variance across all  
985 samples.

986 **S3 Fig.** The number of shared and uniquely significant DEGs between three adipose  
987 tissues in Finnish reindeer due to seasonal differences. Significant DEGs detected in  
988 Finnish reindeer for three adipose tissues due to seasonal change: FM-S vs. FM-W,  
989 FP-S vs. FP-W, and FS-S vs. FS-W.

990 **S4 Fig.** Volcano plot of differentially expressed genes between spring and winter for  
991 metacarpal adipose tissue in Finnish reindeer (FM-S vs. FM-W).

992 **S5 Fig.** Volcano plot of differentially expressed genes between spring and winter for  
993 perirenal adipose tissue in Finnish reindeer (FP-S vs. FP-W).

994 **S6 Fig.** Volcano plot of differentially expressed genes between spring and winter for  
995 prescapular adipose tissue in Finnish reindeer (FS-S vs. FS-W).

996 **S7 Fig.** The number of shared and unique significant DEGs between three adipose  
997 tissues in Even reindeer due to seasonal differences. Significant DEGs detected in  
998 Even reindeer for three adipose tissues due to seasonal change (EM-S vs. EM-W,  
999 EP-S vs. EP-W and ES-S vs. ES-W).

1000 **S8 Fig.** Volcano plot of differentially expressed genes between early spring and  
1001 early winter for metacarpal adipose tissue in Even reindeer (EM-S vs. EM-W).

1002 **S9 Fig.** Volcano plot of differentially expressed genes between early spring and  
1003 early winter for metacarpal adipose tissue in Even reindeer (EM-S vs. EM-W).

1004 **S10 Fig.** Volcano plot of differentially expressed genes between early spring and  
1005 early winter for metacarpal adipose tissue in Even reindeer (EM-S vs. EM-W).

1006 **S11 Fig.** The number of shared and unique significant DEGs in the three adipose  
1007 tissues detected between Even reindeer and Finnish reindeer due to regional  
1008 differences in early spring. Significant DEGs detected in three adipose tissues due to  
1009 regional differences in early spring: EM-S vs. EM-S, EP-S vs. EP-S and ES-S vs.  
1010 ES-S.

1011 **S12 Fig.** The number of shared and unique significant DEGs in the three adipose  
1012 tissues detected between Even reindeer and Finnish reindeer due to regional  
1013 differences in early winter. Significant DEGs detected in three adipose tissues due to

1014 regional differences in early winter: EM-W vs. EM-W, EP-W vs. EP-W and ES-W vs.

1015 ES-W.

1016

1017 **S1 Table.** Statistics of clean data.

1018 **S2 Table.** STAR mapping statistics.

1019 **S3 Table.** Summary of expressed genes in each tissue (sheet). List of expressed

1020 genes in Finnish reindeer metacarpal adipose tissue in spring (FM-S) (sheet 2). List

1021 of expressed genes in Finnish reindeer perirenal adipose tissue in spring (FP-S)

1022 (sheet 3). List of expressed genes in Finnish reindeer prescapular adipose tissue in

1023 spring (FS-S) (sheet 4). List of expressed genes in Finnish reindeer metacarpal

1024 adipose tissue in winter (FM-W) (sheet 5). List of expressed genes in Finnish

1025 reindeer perirenal adipose tissue in winter (FP-W) (sheet 6). List of expressed genes

1026 in Finnish reindeer prescapular adipose tissue in winter (FS-W) (sheet 7). List of

1027 expressed genes in Even reindeer metacarpal adipose tissue in spring (EM-S)

1028 (sheet 8). List of expressed genes in Even reindeer perirenal adipose tissue in spring

1029 (EP-S) (sheet 9). List of expressed genes in Even reindeer prescapular adipose

1030 tissue in spring (ES-S) (sheet 10). List of expressed genes in Even reindeer

1031 metacarpal adipose tissue in winter (EM-W) (sheet 11). List of expressed genes in

1032 Even reindeer perirenal adipose tissue in winter (EP-W) (sheet 12). List of expressed

1033 genes in Even reindeer prescapular adipose tissue in winter (ES-W) (sheet 13).

1034 **S4 Table.** Uniquely expressed genes in metacarpal adipose tissue shared by

1035 Finnish and Even reindeer in both seasons.

- 1036 **S5 Table.** Significantly differentially expressed genes between spring and winter in  
1037 Finnish reindeer metacarpal tissue (FM-S vs. FM-W).
- 1038 **S6 Table.** Significantly differentially expressed genes between spring and winter in  
1039 Finnish reindeer perirenal tissue (FP-S vs. FP-W).
- 1040 **S7 Table.** Significantly differentially expressed genes between spring and winter in  
1041 Finnish reindeer prescapular tissue (FS-S vs. FS-W).
- 1042 **S8 Table.** Significantly differentially expressed genes between spring and winter in  
1043 Even reindeer metacarpal tissue (EM-S vs. EM-W).
- 1044 **S9 Table.** Significantly differentially expressed genes between spring and winter in  
1045 Even reindeer perirenal tissue (EP-S vs. EP-W).
- 1046 **S10 Table.** Significantly differentially expressed genes between spring and winter in  
1047 Even reindeer prescapular tissue (ES-S vs. ES-W).
- 1048 **S11 Table.** Significantly differentially expressed genes between Even and Finnish  
1049 reindeer in metacarpal adipose tissue in spring (EM-S vs. FM-S).
- 1050 **S12 Table.** Significantly differentially expressed genes between Even and Finnish  
1051 reindeer in perirenal adipose tissue in spring (EP-S vs. FM-S).
- 1052 **S13 Table.** Significantly differentially expressed genes between Even and Finnish  
1053 reindeer in prescapular adipose tissue in spring (ES-S vs. FS-S).
- 1054 **S14 Table.** Significantly differentially expressed genes between Even and Finnish  
1055 reindeer in metacarpal adipose tissue in winter (EM-W vs. FM-W).
- 1056 **S15 Table.** Significantly differentially expressed genes between Even and Finnish  
1057 reindeer in perirenal adipose tissue in winter (EP-W vs. FPW).

1058 **S16 Table.** Significantly differentially expressed genes between Even and Finnish  
1059 reindeer in prescapular adipose tissue in winter (ES-W vs. FS-W).

1060 **S17 Table.** Significantly differentially expressed genes between female and male  
1061 Even reindeer metacarpal adipose tissue (EM-F vs. EM-M).

1062 **S18 Table.** Significantly differentially expressed genes between female and male  
1063 Even reindeer perirenal adipose tissue (EP-F vs. EP-M).

1064 **S19 Table.** Significantly differentially expressed genes between female and male  
1065 Even reindeer prescapular adipose tissue (ES-F vs. ES-M).

1066 **S20 Table.** List of significantly enriched GO terms associated with significantly  
1067 downregulated DEGs (sheet 1) and upregulated DEGs (sheet 2) in Finnish reindeer  
1068 metacarpal adipose tissue in spring compared to winter.

1069 **S21 Table.** List of significantly enriched GO terms associated with significantly  
1070 downregulated DEGs (sheet 1) and upregulated DEGs (sheet 2) in Finnish reindeer  
1071 perirenal adipose tissue in spring compared to winter.

1072 **S22 Table.** List of significantly enriched GO terms associated with significantly  
1073 downregulated DEGs (sheet 1) and upregulated DEGs (sheet 2) in Finnish reindeer  
1074 prescapular adipose tissue in spring compared to winter.

1075 **S23 Table.** List of significantly enriched GO terms associated with significantly  
1076 downregulated DEGs in Even reindeer metacarpal adipose tissue in spring  
1077 compared to winter.

1078 **S24 Table.** List of significantly enriched GO terms associated with significantly  
1079 downregulated DEGs (sheet 1) and upregulated DEGs (sheet 2) in Even reindeer

1080 perirenal adipose tissue compared to Finnish reindeer perirenal adipose tissue in  
1081 winter.

1082 **S25 Table.** List of significantly enriched GO terms associated with significantly  
1083 upregulated DEGs in Even reindeer prescapular adipose tissue compared to Finnish  
1084 reindeer prescapular adipose tissue in spring.

1085 **S26 Table.** List of significantly enriched GO terms associated with significantly  
1086 downregulated DEGs (sheet 1) and upregulated DEGs (sheet 2) in Even reindeer  
1087 prescapular adipose tissue compared to Finnish reindeer prescapular adipose tissue  
1088 in winter.

1089 **S27 Table.** List of significantly enriched GO terms associated with significantly  
1090 downregulated DEGs in female Even reindeer metacarpal adipose tissue compared  
1091 to male Even reindeer metacarpal adipose tissue.

1092 **S28 Table.** List of significantly enriched GO terms associated with significantly  
1093 upregulated DEGs in female Even reindeer perirenal adipose tissue compared to  
1094 male Even reindeer perirenal adipose tissue.

1095 **S29 Table.** List of significantly enriched KEGG pathways associated with  
1096 significantly downregulated DEGs (sheet 1) and upregulated DEGs (sheet 2) in  
1097 Finnish reindeer metacarpal adipose tissue in spring compared to winter.

1098 **S30 Table.** List of significantly enriched KEGG pathways associated with  
1099 significantly downregulated DEGs (sheet 1) and upregulated DEGs (sheet 2) in  
1100 Finnish reindeer perirenal adipose tissue in spring compared to winter.



1101 **S31 Table.** List of significantly enriched KEGG pathways associated with  
1102 significantly downregulated DEGs (sheet 1) and upregulated DEGs (sheet 2) in  
1103 Finnish reindeer prescapular adipose tissue in spring compared to winter.

1104 **S32 Table.** List of significantly enriched KEGG pathways associated with  
1105 significantly downregulated DEGs in Even reindeer metacarpal adipose tissue  
1106 compared to Finnish reindeer metacarpal adipose tissue in spring.

1107 **S33 Table.** List of significantly enriched KEGG pathway associated with significantly  
1108 downregulated DEGs in Even reindeer metacarpal adipose tissue compared to  
1109 Finnish reindeer metacarpal adipose tissue in winter.

1110 **S34 Table.** List of significantly enriched KEGG pathways associated with  
1111 significantly downregulated DEGs (sheet 1) and upregulated DEGs (sheet 2) in Even  
1112 reindeer perirenal adipose tissue compared to Finnish reindeer perirenal adipose  
1113 tissue in winter.

1114 **S35 Table.** List of significantly enriched KEGG pathways associated with  
1115 significantly downregulated DEGs (sheet 1) and upregulated DEGs (sheet 2) in Even  
1116 reindeer prescapular adipose tissue compared to Finnish reindeer prescapular  
1117 adipose tissue in winter.

1118 **S36 Table.** List of the top 25 most abundant genes expressed in the three adipose  
1119 tissues based on mean TPM in Finnish reindeer (sheet1) and Even reindeer  
1120 (sheet2).

1121

1122 **Author contributions**

1123 **Conceptualization:** Juha Kantanen

1124 **Data curation:** Melak Weldenegotguad, Kisun Pokharel, Laura Niiranen

1125 **Formal analysis:** Melak Weldenegotguad, Laura Niiranen

1126 **Funding acquisition:** Juha Kantanen

1127 **Investigation:** Melak Weldenegotguad, Kisun Pokharel, Laura Niiranen, Päivi

1128 Soppela

1129 **Methodology:** Melak Weldenegotguad, Kisun Pokharel, Laura Niiranen, Päivi

1130 Soppela

1131 **Project Administration:** Juha Kantanen

1132 **Resources:** Päivi Soppela, Innokentyi Ammosov, Mervi Honkatukia, Heli Lindeberg,

1133 Jaana Peippo, Tiina Reilas, Nuccio Mazzullo, Florian Stammler, Juha Kantanen

1134 **Supervision:** Juha Kantanen, Tommi Nyman, Arja Tervahauta, Päivi Soppela

1135 **Visualization:** Melak Weldenegotguad, Kisun Pokharel, Laura Niiranen, Tommi

1136 Nyman

1137 **Writing – original draft preparation:** Melak Weldenegotguad, Kisun Pokharel,

1138 Laura Niiranen, Juha Kantanen

1139 **Writing – review and editing:** Melak Weldenegotguad, Kisun Pokharel, Laura

1140 Niiranen, Päivi Soppela, Innokentyi Ammosov, Mervi Honkatukia, Heli Lindeberg,

1141 Jaana Peippo, Tiina Reilas, Nuccio Mazzullo, Kari A. Mäkelä, Tommi Nyman, Arja

1142 Tervahauta, Karl-Heinz Herzig, Florian Stammler, Juha Kantanen

1143

## 1144 **Funding disclosure**

1145 This study was funded by the Academy of Finland in the Arctic Research  
1146 Programme ARKTIKO (decision number 286040).

## 1147 **Acknowledgements**

1148 We thank reindeer herders from the Sallivaara and Oraniemi reindeer herding  
1149 districts in Finland and from the Eveno-Bytantay District in Sakha, Russia for  
1150 providing reindeer for our research and for helping with the field work. We thank  
1151 Tuula-Marjatta Hamama for RNA extractions. We thank the CSC-IT Center for  
1152 Science, Finland, for computational resources, and the Finnish Functional  
1153 Genomics Centre supported by the University of Turku, Åbo Akademi University,  
1154 and Biocenter Finland for RNA sequencing.

1155

## 1156 **Competing interest**

1157 The authors declare no conflict of interest. The funders had no role in the design of  
1158 the study; in the collection, analyses, or interpretation of data; in the writing of the  
1159 manuscript, or in the decision to publish the results.

## 1160 **References**

- 1161 1. Forbes BC, Bölter M, Müller-Wille L, Hukkinen J, Müller F, Gunsley N, et al.  
1162 Reindeer management in northernmost Europe: linking practical and scientific  
1163 knowledge in social-ecological systems. Springer Science & Business Media;  
1164 2006.
- 1165 2. Røed KH, Flagstad Ø, Nieminen M, Holand Ø, Dwyer MJ, Røv N, et al. Genetic  
1166 analyses reveal independent domestication origins of Eurasian reindeer.

- 1167 Proceedings of the Royal Society B: Biological Sciences. 2008;275:  
1168 1849–1855. doi:10.1098/rspb.2008.0332
- 1169 3. Weldenegodguad M, Pokharel K, Ming Y, Honkatukia M, Peippo J, Reilas T, et  
1170 al. Genome sequence and comparative analysis of reindeer ( tarandus) in  
1171 northern Eurasia. Scientific Reports. 2020;10: 8980.  
1172 doi:10.1038/s41598-020-65487-y
- 1173 4. Lin Z, Chen L, Chen X, Zhong Y, Yang Y, Xia W, et al. Biological adaptations in  
1174 the Arctic cervid, the reindeer (Rangifer tarandus). Science. 2019;364.  
1175 doi:10.1126/science.aav6312
- 1176 5. Soppela P, Saarela S, Heiskari U, Nieminen M. The effects of wintertime  
1177 undernutrition on plasma leptin and insulin levels in an arctic ruminant, the  
1178 reindeer. Comparative Biochemistry and Physiology Part B: Biochemistry and  
1179 Molecular Biology. 2008;149: 613–621. doi:10.1016/j.cbpb.2007.12.008
- 1180 6. Chouchani ET, Kajimura S. Metabolic adaptation and maladaptation in adipose  
1181 tissue. Nature Metabolism. 2019;1: 189–200. doi:10.1038/s42255-018-0021-8
- 1182 7. Cannon B, Nedergaard J. Brown Adipose Tissue: Function and Physiological  
1183 Significance. Physiological Reviews. 2004;84: 277–359.  
1184 doi:10.1152/physrev.00015.2003
- 1185 8. Kershaw EE, Flier JS. Adipose Tissue as an Endocrine Organ. J Clin Endocrinol  
1186 Metab. 2004;89: 2548–2556. doi:10.1210/jc.2004-0395
- 1187 9. Trzeciak-Ryczek A, Tokarz-Deptuła B, Niedźwiedzka-Rystwej P, Deptuła W.  
1188 Adipose tissue – component of the immune system. 2011 [cited 15 Jun 2020].  
1189 Available:  
1190 /paper/Adipose-tissue-%E2%80%93-component-of-the-immune-system-Trzeci  
1191 ak-Ryczek-Tokarz-Deptu%C5%82a/4ffd92a4b2cdc1f0c80dc139f8e146fd06ef4  
1192 c7d
- 1193 10. Soppela P, Nieminen M, Saarela S, Keith JS, Morrison JN, Macfarlane F, et  
1194 al. Brown fat-specific mitochondrial uncoupling protein in adipose tissues of  
1195 newborn reindeer. American Journal of Physiology-Regulatory, Integrative and  
1196 Comparative Physiology. 1991;260: R1229–R1234.  
1197 doi:10.1152/ajpregu.1991.260.6.R1229
- 1198 11. Soppela P, Sormunen R, Saarela S, Huttunen P, Nieminen M. Localization,  
1199 cellular morphology and respiratory capacity of “brown” adipose tissue in  
1200 newborn reindeer. Comparative Biochemistry and Physiology Part A:  
1201 Physiology. 1992;101: 281–293. doi:10.1016/0300-9629(92)90534-W
- 1202 12. Giordano A, Smorlesi A, Frontini A, Barbatelli G, Cinti S. MECHANISMS IN  
1203 ENDOCRINOLOGY: White, brown and pink adipocytes: the extraordinary  
1204 plasticity of the adipose organ. European Journal of Endocrinology. 2014;170:  
1205 R159–R171. doi:10.1530/EJE-13-0945
- 1206 13. Bonet ML, Oliver P, Palou A. Pharmacological and nutritional agents promoting  
1207 browning of white adipose tissue. Biochimica et Biophysica Acta (BBA) -  
1208 Molecular and Cell Biology of Lipids. 2013;1831: 969–985.  
1209 doi:10.1016/j.bbalip.2012.12.002

- 1210 14. Li Z, Hardij J, Bagchi DP, Scheller EL, MacDougald OA. Development,  
1211 regulation, metabolism and function of bone marrow adipose tissues. *Bone*.  
1212 2018;110: 134–140. doi:10.1016/j.bone.2018.01.008
- 1213 15. Hawkes CP, Mostoufi-Moab S. Fat-bone interaction within the bone marrow  
1214 milieu: Impact on hematopoiesis and systemic energy metabolism. *Bone*.  
1215 2019;119: 57–64. doi:10.1016/j.bone.2018.03.012
- 1216 16. Lecka-Czernik B. Marrow fat metabolism is linked to the systemic energy  
1217 metabolism. *Bone*. 2012;50: 534–539. doi:10.1016/j.bone.2011.06.032
- 1218 17. Thouzeau C, Massemin S, Handrich Y. Bone marrow fat mobilization in relation  
1219 to lipid and protein catabolism during prolonged fasting in barn owls. *J Comp*  
1220 *Physiol B*. 1997;167: 17–24. doi:10.1007/s003600050043
- 1221 18. Davis JL, Valkenburg P, Reed DJ. Correlations and Depletion Patterns of  
1222 Marrow Fat in Caribou Bones. *The Journal of Wildlife Management*. 1987;51:  
1223 365–371. doi:10.2307/3801018
- 1224 19. Soppela P, Nieminen M. The effect of wintertime undernutrition on the fatty acid  
1225 composition of leg bone marrow fats in reindeer (*Rangifer tarandus tarandus*  
1226 L.). *Comparative Biochemistry and Physiology Part B: Biochemistry and*  
1227 *Molecular Biology*. 2001;128: 63–72. doi:10.1016/S1096-4959(00)00297-9
- 1228 20. Shore AM, Karamitri A, Kemp P, Speakman JR, Graham NS, Lomax MA.  
1229 Cold-Induced Changes in Gene Expression in Brown Adipose Tissue, White  
1230 Adipose Tissue and Liver. Lenburg M, editor. *PLoS ONE*. 2013;8:  
1231 e68933–e68933. doi:10.1371/journal.pone.0068933
- 1232 21. Marcher A-B, Loft A, Nielsen R, Vihervaara T, Madsen JGS, Sysi-Aho M, et al.  
1233 RNA-Seq and Mass-Spectrometry-Based Lipidomics Reveal Extensive  
1234 Changes of Glycerolipid Pathways in Brown Adipose Tissue in Response to  
1235 Cold. *Cell reports*. 2015;13: 2000–13. doi:10.1016/j.celrep.2015.10.069
- 1236 22. Li B, Qiao L, An L, Wang W, Liu J, Ren Y, et al. Transcriptome analysis of  
1237 adipose tissues from two fat-tailed sheep breeds reveals key genes involved in  
1238 fat deposition. *BMC Genomics*. 2018;19: 1–13.  
1239 doi:10.1186/s12864-018-4747-1
- 1240 23. Ma L, Zhang M, Jin Y, Erdenee S, Hu L, Chen H, et al. Comparative  
1241 Transcriptome Profiling of mRNA and lncRNA Related to Tail Adipose Tissues  
1242 of Sheep. *Front Genet*. 2018;9. doi:10.3389/fgene.2018.00365
- 1243 24. Su A, Fuente LFD, Mateo J, Guti B. Early adipose deposits in sheep □:  
1244 comparative analysis of the perirenal fat transcriptome of Assaf and Churra  
1245 suckling lambs. 2018; 605–617. doi:10.1111/age.12725
- 1246 25. MIAO Z, WEI P, KHAN MA, ZHANG J, GUO L, LIU D, et al. Transcriptome  
1247 analysis reveals differential gene expression in intramuscular adipose tissues of  
1248 Jinhua and Landrace pigs. *J Vet Med Sci*. 2018;80: 953–959.  
1249 doi:10.1292/jvms.18-0074
- 1250 26. Xing K, Wang K, Ao H, Chen S, Tan Z, Wang Y, et al. Comparative adipose  
1251 transcriptome analysis digs out genes related to fat deposition in two pig  
1252 breeds. *Scientific Reports*. 2019;9: 12925. doi:10.1038/s41598-019-49548-5

- 1253 27. Xu Y, Qi X, Hu M, Lin R, Hou Y, Wang Z, et al. Transcriptome Analysis of  
1254 Adipose Tissue Indicates That the cAMP Signaling Pathway Affects the Feed  
1255 Efficiency of Pigs. *Genes*. 2018;9: 336. doi:10.3390/genes9070336
- 1256 28. Ferguson JF, Xue C, Hu Y, Li M, Reilly MP. Adipose tissue RNASeq reveals  
1257 novel gene-nutrient interactions following n-3 PUFA supplementation and  
1258 evoked inflammation in humans. *J Nutr Biochem*. 2016;30: 126–132.  
1259 doi:10.1016/j.jnutbio.2015.12.010
- 1260 29. Haffa M, Holowatyj AN, Kratz M, Toth R, Benner A, Gigic B, et al.  
1261 Transcriptome Profiling of Adipose Tissue Reveals Depot-Specific Metabolic  
1262 Alterations Among Patients with Colorectal Cancer. *The Journal of Clinical*  
1263 *Endocrinology & Metabolism*. 2019;104: 5225–5237.  
1264 doi:10.1210/jc.2019-00461
- 1265 30. Schleinitz D, Krause K, Wohland T, Gebhardt C, Linder N, Stumvoll M, et al.  
1266 Identification of distinct transcriptome signatures of human adipose tissue from  
1267 fifteen depots. *European Journal of Human Genetics*. 2020;28: 1714–1725.  
1268 doi:10.1038/s41431-020-0681-1
- 1269 31. Zhou Y, Sun J, Li C, Wang Y, Li L, Cai H, et al. Characterization of  
1270 Transcriptional Complexity during Adipose Tissue Development in Bovines of  
1271 Different Ages and Sexes. *te Pas MFW, editor. PLoS ONE*. 2014;9: e101261.  
1272 doi:10.1371/journal.pone.0101261
- 1273 32. Keipert S, Kutschke M, Ost M, Schwarzmayr T, van Schothorst EM, Lamp D, et  
1274 al. Long-Term Cold Adaptation Does Not Require FGF21 or UCP1. *Cell*  
1275 *Metabolism*. 2017;26: 437-446.e5. doi:10.1016/J.CMET.2017.07.016
- 1276 33. Wu Y, Smas CM. Expression and regulation of transcript for the novel  
1277 transmembrane protein Tmem182 in the adipocyte and muscle lineage. *BMC*  
1278 *Res Notes*. 2008;1: 85. doi:10.1186/1756-0500-1-85
- 1279 34. Kumar H, Srikanth K, Park W, Lee S-H, Choi B-H, Kim H, et al. Transcriptome  
1280 analysis to identify long non coding RNA (lncRNA) and characterize their  
1281 functional role in back fat tissue of pig. *Gene*. 2019;703: 71–82.  
1282 doi:10.1016/j.gene.2019.04.014
- 1283 35. Dang F, Wu R, Wang P, Wu Y, Azam MS, Xu Q, et al. Fasting and Feeding  
1284 Signals Control the Oscillatory Expression of Angptl8 to Modulate Lipid  
1285 Metabolism. *Scientific Reports*. 2016;6: 36926. doi:10.1038/srep36926
- 1286 36. Lu X, Solmonson A, Lodi A, Nowinski SM, Sentandreu E, Riley CL, et al. The  
1287 early metabolomic response of adipose tissue during acute cold exposure in  
1288 mice. *Scientific Reports*. 2017;7: 3455. doi:10.1038/s41598-017-03108-x
- 1289 37. Hiroshima Y, Yamamoto T, Watanabe M, Baba Y, Shinohara Y. Effects of cold  
1290 exposure on metabolites in brown adipose tissue of rats. *Molecular Genetics*  
1291 *and Metabolism Reports*. 2018;15: 36–42. doi:10.1016/j.ymgmr.2018.01.005
- 1292 38. Lynes MD, Shamsi F, Sustarsic EG, Leiria LO, Wang C-H, Su S-C, et al.  
1293 Cold-Activated Lipid Dynamics in Adipose Tissue Highlights a Role for  
1294 Cardiolipin in Thermogenic Metabolism. *Cell reports*. 2018;24: 781–790.  
1295 doi:10.1016/j.celrep.2018.06.073

- 1296 39. Pond CM. An evolutionary and functional view of mammalian adipose tissue.  
1297 Proceedings of the Nutrition Society. 1992;51: 367–377.  
1298 doi:10.1079/PNS19920050
- 1299 40. Pond CM. The Evolution of Mammalian Adipose Tissues. In: Symonds ME,  
1300 editor. Adipose Tissue Biology. Cham: Springer International Publishing; 2017.  
1301 pp. 1–59. doi:10.1007/978-3-319-52031-5\_1
- 1302 41. Marioni JC, Mason CE, Mane SM, Stephens M, Gilad Y. RNA-seq: an  
1303 assessment of technical reproducibility and comparison with gene expression  
1304 arrays. Genome research. 2008;18: 1509–17. doi:10.1101/gr.079558.108
- 1305 42. Wang Z, Gerstein M, Snyder M. RNA-Seq: a revolutionary tool for  
1306 transcriptomics. Nat Rev Genet. 2009;10: 57–63. doi:10.1038/nrg2484
- 1307 43. Song C, Huang Y, Yang Z, Ma Y, Chaogetu B, Zhuoma Z, et al. RNA-Seq  
1308 Analysis Identifies Differentially Expressed Genes in Subcutaneous Adipose  
1309 Tissue in Qaidaford Cattle, Cattle-Yak, and Angus Cattle. Animals. 2019;9:  
1310 1077. doi:10.3390/ani9121077
- 1311 44. Basse AL, Dixen K, Yadav R, Tygesen MP, Qvortrup K, Kristiansen K, et al.  
1312 Global gene expression profiling of brown to white adipose tissue  
1313 transformation in sheep reveals novel transcriptional components linked to  
1314 adipose remodeling. BMC Genomics. 2015;16: 215.  
1315 doi:10.1186/s12864-015-1405-8
- 1316 45. Syamsunarno MRAA, Iso T, Yamaguchi A, Hanaoka H, Putri M, Obokata M, et  
1317 al. Fatty Acid Binding Protein 4 and 5 Play a Crucial Role in Thermogenesis  
1318 under the Conditions of Fasting and Cold Stress. PLOS ONE. 2014;9:  
1319 e90825–e90825.
- 1320 46. Avilés C, Polvillo O, Peña F, Juárez M, Martínez AL, Molina A. Associations  
1321 between DGAT1, FABP4, LEP, RORC, and SCD1 gene polymorphisms and fat  
1322 deposition in Spanish commercial beef. J Anim Sci. 2013;91: 4571–4577.  
1323 doi:10.2527/jas.2013-6402
- 1324 47. Wei S, Zan LS, Wang HB, Cheng G, Du M, Jiang Z, et al. Adenovirus-mediated  
1325 interference of FABP4 regulates mRNA expression of ADIPOQ, LEP and LEPR  
1326 in bovine adipocytes. Genet Mol Res. 2013;12: 494–505.  
1327 doi:10.4238/2013.January.4.21
- 1328 48. Kern PA, Gregorio GBD, Lu T, Rassouli N, Ranganathan G. Adiponectin  
1329 Expression From Human Adipose Tissue: Relation to Obesity, Insulin  
1330 Resistance, and Tumor Necrosis Factor- $\alpha$  Expression. Diabetes. 2003;52:  
1331 1779–1785. doi:10.2337/diabetes.52.7.1779
- 1332 49. Dall'Olio S, Davoli R, Buttazzoni L, Zambonelli P, Russo V. Study of porcine  
1333 adiponectin (ADIPOQ) gene and association of a missense mutation with EBVs  
1334 for production and carcass traits in Italian Duroc heavy pigs. Livestock Science.  
1335 2009;125: 101–104. doi:10.1016/j.livsci.2009.03.003
- 1336 50. Kumar V, Sekar M, Sarkar P, Acharya KK, Thirumurugan K. Dynamics of HOX  
1337 gene expression and regulation in adipocyte development. Gene. 2021;768:  
1338 145308. doi:10.1016/j.gene.2020.145308

- 1339 51. Masuda Y, Oku H, Okumura T, Nomura K, Kurokawa T. Feeding restriction  
1340 alters expression of some ATP related genes more sensitively than the  
1341 RNA/DNA ratio in zebrafish, *Danio rerio*. *Comparative Biochemistry and*  
1342 *Physiology Part B: Biochemistry and Molecular Biology*. 2009;152: 287–291.  
1343 doi:10.1016/j.cbpb.2008.12.008
- 1344 52. Mohamed-Ali V, Pinkney JH, Coppack SW. Adipose tissue as an endocrine and  
1345 paracrine organ. *International Journal of Obesity*. 1998;22: 1145–1158.  
1346 doi:10.1038/sj.ijo.0800770
- 1347 53. Pénicaud L, Cousin B, Laharrague P, Leloup C, Lorsignol A, Casteilla L.  
1348 Adipose Tissues as Part of the Immune System: Role of Leptin and Cytokines.  
1349 In: Kordon C, Robinson I, Hanoune J, Dantzer R, Christen Y, editors. *Brain*  
1350 *Somatic Cross-Talk and the Central Control of Metabolism*. Berlin, Heidelberg:  
1351 Springer; 2003. pp. 81–89. doi:10.1007/978-3-642-18999-9\_6
- 1352 54. Schäffler A, Schölmerich J. Innate immunity and adipose tissue biology. *Trends*  
1353 *in Immunology*. 2010;31: 228–235. doi:10.1016/j.it.2010.03.001
- 1354 55. Lin Y-W, Wei L-N. Innate immunity orchestrates adipose tissue homeostasis.  
1355 *Hormone Molecular Biology and Clinical Investigation*. 2017;31.  
1356 doi:10.1515/hmbci-2017-0013
- 1357 56. Tseng Y-H, Ke P-Y, Liao C-J, Wu S-M, Chi H-C, Tsai C-Y, et al. Chromosome  
1358 19 open reading frame 80 is upregulated by thyroid hormone and modulates  
1359 autophagy and lipid metabolism. *Autophagy*. 2014;10: 20–31.  
1360 doi:10.4161/auto.26126
- 1361 57. Luo M, Peng D. ANGPTL8: An Important Regulator in Metabolic Disorders.  
1362 *Front Endocrinol*. 2018;9. doi:10.3389/fendo.2018.00169
- 1363 58. Siddiq A, Cirillo E, Tareen SHK, Ali A, Kutmon M, Eijssen LMT, et al. Biological  
1364 Pathways Leading From ANGPTL8 to Diabetes Mellitus—A Co-expression  
1365 Network Based Analysis. *Front Physiol*. 2018;9. doi:10.3389/fphys.2018.01841
- 1366 59. Wing EJ, Magee DM, Barczynski LK. Acute starvation in mice reduces the  
1367 number of T cells and suppresses the development of T-cell-mediated  
1368 immunity. *Immunology*. 1988;63: 677–682.
- 1369 60. Leibel RL. Molecular physiology of weight regulation in mice and humans.  
1370 *International Journal of Obesity*. 2008;32: S98–S108. doi:10.1038/ijo.2008.245
- 1371 61. Wensveen FM, Valentić S, Šestan M, Turk Wensveen T, Polić B. Interactions  
1372 between adipose tissue and the immune system in health and malnutrition.  
1373 *Seminars in Immunology*. 2015;27: 322–333. doi:10.1016/j.smim.2015.10.006
- 1374 62. Lee M-J, Fried SK. Sex-dependent Depot Differences in Adipose Tissue  
1375 Development and Function; Role of Sex Steroids. *Journal of Obesity &*  
1376 *Metabolic Syndrome*. 2017;26: 172–180. doi:10.7570/jomes.2017.26.3.172
- 1377 63. Valencak TG, Osterrieder A, Schulz TJ. Sex matters: The effects of biological  
1378 sex on adipose tissue biology and energy metabolism. *Redox Biology*. 2017;12:  
1379 806–813. doi:10.1016/j.redox.2017.04.012



- 1380 64. Mukaj A, Piálek J, Fotopulosova V, Morgan AP, Odenthal-Hesse L, Parvanov  
1381 ED, et al. Prdm9 Intersubspecific Interactions in Hybrid Male Sterility of House  
1382 Mouse. *Mol Biol Evol.* [cited 4 Nov 2020]. doi:10.1093/molbev/msaa167
- 1383 65. Davies B, Hatton E, Altemose N, Hussin JG, Pratto F, Zhang G, et al.  
1384 Re-engineering the zinc fingers of PRDM9 reverses hybrid sterility in mice.  
1385 *Nature.* 2016;530: 171–176. doi:10.1038/nature16931
- 1386 66. Kulkarni M, Smith HE. E1 Ubiquitin-Activating Enzyme UBA-1 Plays Multiple  
1387 Roles throughout *C. elegans* Development. *PLOS Genetics.* 2008;4: e1000131.  
1388 doi:10.1371/journal.pgen.1000131
- 1389 67. Yamauchi Y, Riel JM, Stoytcheva Z, Ward MA. Two Y Genes Can Replace the  
1390 Entire Y Chromosome for Assisted Reproduction in the Mouse. *Science.*  
1391 2014;343: 69–72. doi:10.1126/science.1242544
- 1392 68. Ruthig VA, Nielsen T, Riel JM, Yamauchi Y, Ortega EA, Salvador Q, et al.  
1393 Testicular abnormalities in mice with Y chromosome deficiencies. *Biol Reprod.*  
1394 2017;96: 694–706. doi:10.1095/biolreprod.116.144006
- 1395 69. Lardone MC, Parodi DA, Valdevenito R, Ebensperger M, Piottante A,  
1396 Madariaga M, et al. Quantification of DDX3Y, RBMY1, DAZ and TSPY mRNAs  
1397 in testes of patients with severe impairment of spermatogenesis. *Mol Hum*  
1398 *Reprod.* 2007;13: 705–712. doi:10.1093/molehr/gam057
- 1399 70. Ramathal C, Angulo B, Sukhwani M, Cui J, Durruthy-Durruthy J, Fang F, et al.  
1400 DDX3Y gene rescue of a Y chromosome AZFa deletion restores germ cell  
1401 formation and transcriptional programs. *Scientific Reports.* 2015;5: 15041.  
1402 doi:10.1038/srep15041
- 1403 71. Matsumura T, Endo T, Isotani A, Ogawa M, Ikawa M. An azoospermic factor  
1404 gene, *Ddx3y* and its paralog, *Ddx3x* are dispensable in germ cells for male  
1405 fertility. *J Reprod Dev.* 2019;65: 121–128. doi:10.1262/jrd.2018-145
- 1406 72. Horiuchi K, Perez-Cerezales S, Papasaikas P, Ramos-Ibeas P, López-Cardona  
1407 AP, Laguna-Barraza R, et al. Impaired Spermatogenesis, Muscle, and  
1408 Erythrocyte Function in U12 Intron Splicing-Defective *Zrsr1* Mutant Mice. *Cell*  
1409 *Reports.* 2018;23: 143–155. doi:10.1016/j.celrep.2018.03.028
- 1410 73. Kishi K, Uchida A, Takase HM, Suzuki H, Kurohmaru M, Tsunekawa N, et al.  
1411 Spermatogonial deubiquitinase USP9X is essential for proper spermatogenesis  
1412 in mice. *Reproduction.* 2017;154: 135–143. doi:10.1530/REP-17-0184
- 1413 74. Nilssen KJ, Sundsfjord JA, Blix AS. Regulation of metabolic rate in Svalbard  
1414 and Norwegian reindeer. *American Journal of Physiology-Regulatory,*  
1415 *Integrative and Comparative Physiology.* 1984;247: R837–R841.  
1416 doi:10.1152/ajpregu.1984.247.5.R837
- 1417 75. Fantuzzi G. Adipose tissue, adipokines, and inflammation. *Journal of Allergy*  
1418 *and Clinical Immunology.* 2005;115: 911–919. doi:10.1016/j.jaci.2005.02.023
- 1419 76. Andrews S. A quality control analysis tool for high throughput sequencing data:  
1420 *s-andrews/FastQC.* 2019. Available: <https://github.com/s-andrews/FastQC>

- 1421 77. Ewels P, Magnusson M, Källér M, Lundin S. MultiQC: summarize analysis  
1422 results for multiple tools and samples in a single report. *Bioinformatics*. 2016;32:  
1423 3047–3048. doi:10.1093/bioinformatics/btw354
- 1424 78. Dobin A, Davis CA, Zaleski C, Schlesinger F, Drenkow J, Chaisson M, et al.  
1425 STAR: ultrafast universal RNA-seq aligner. *Bioinformatics*. 2012;29: 15–21.  
1426 doi:10.1093/bioinformatics/bts635
- 1427 79. Liao Y, Smyth GK, Shi W. featureCounts: an efficient general purpose program  
1428 for assigning sequence reads to genomic features. *Bioinformatics*. 2014;30:  
1429 923–930. doi:10.1093/bioinformatics/btt656
- 1430 80. Robinson MD, McCarthy DJ, Smyth GK. edgeR: a Bioconductor package for  
1431 differential expression analysis of digital gene expression data. *Bioinformatics*.  
1432 2010;26: 139–140. doi:10.1093/bioinformatics/btp616
- 1433 81. Love MI, Huber W, Anders S. Moderated estimation of fold change and  
1434 dispersion for RNA-seq data with DESeq2. *Genome biology*. 2014;15: 550.  
1435 doi:10.1186/s13059-014-0550-8
- 1436 82. Tian T, Liu Y, Yan H, You Q, Yi X, Du Z, et al. agriGO v2.0: a GO analysis toolkit  
1437 for the agricultural community, 2017 update. *Nucleic Acids Research*. 2017;45:  
1438 W122–W129. doi:10.1093/nar/gkx382
- 1439 83. Luo W, Friedman MS, Shedden K, Hankenson KD, Woolf PJ. GAGE: generally  
1440 applicable gene set enrichment for pathway analysis. *BMC Bioinformatics*.  
1441 2009;10: 161–161. doi:10.1186/1471-2105-10-161
- 1442 84. Cadenas S, Echtay KS, Harper JA, Jekabsons MB, Buckingham JA, Grau E, et  
1443 al. The Basal Proton Conductance of Skeletal Muscle Mitochondria from  
1444 Transgenic Mice Overexpressing or Lacking Uncoupling Protein-3. *Journal of*  
1445 *Biological Chemistry*. 2002;277: 2773–2778. doi:10.1074/jbc.M109736200
- 1446
- 1447

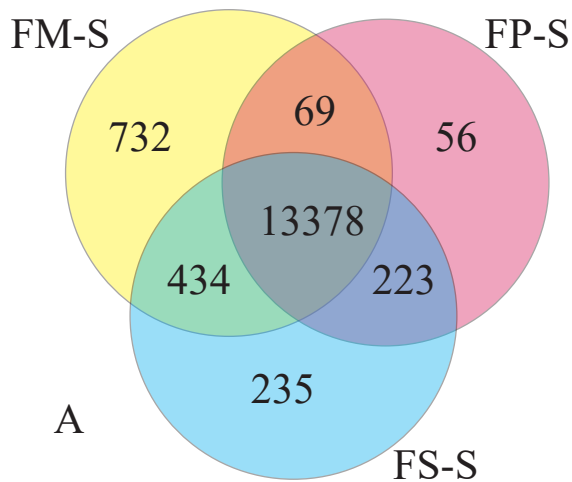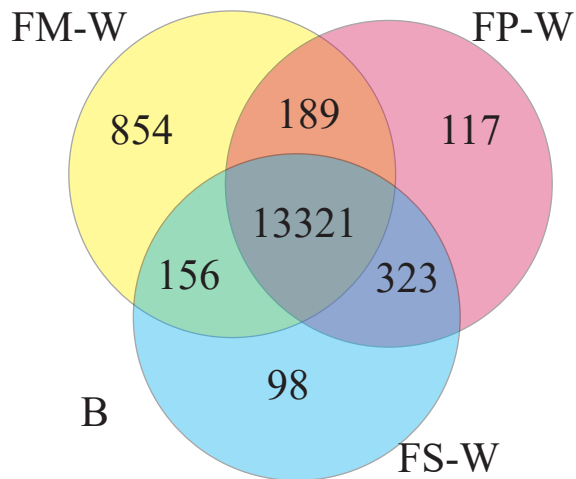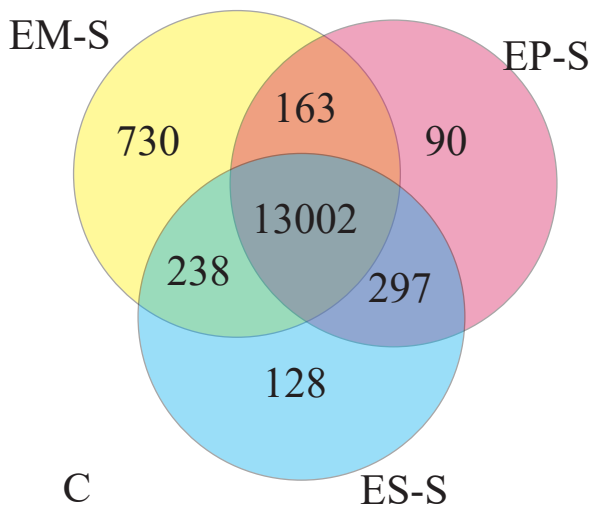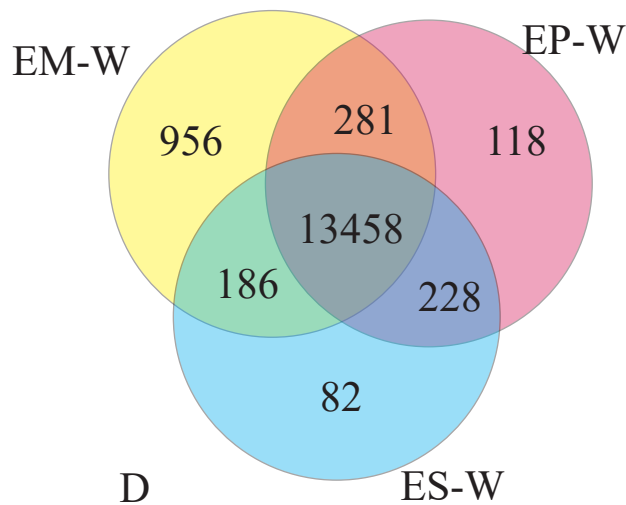

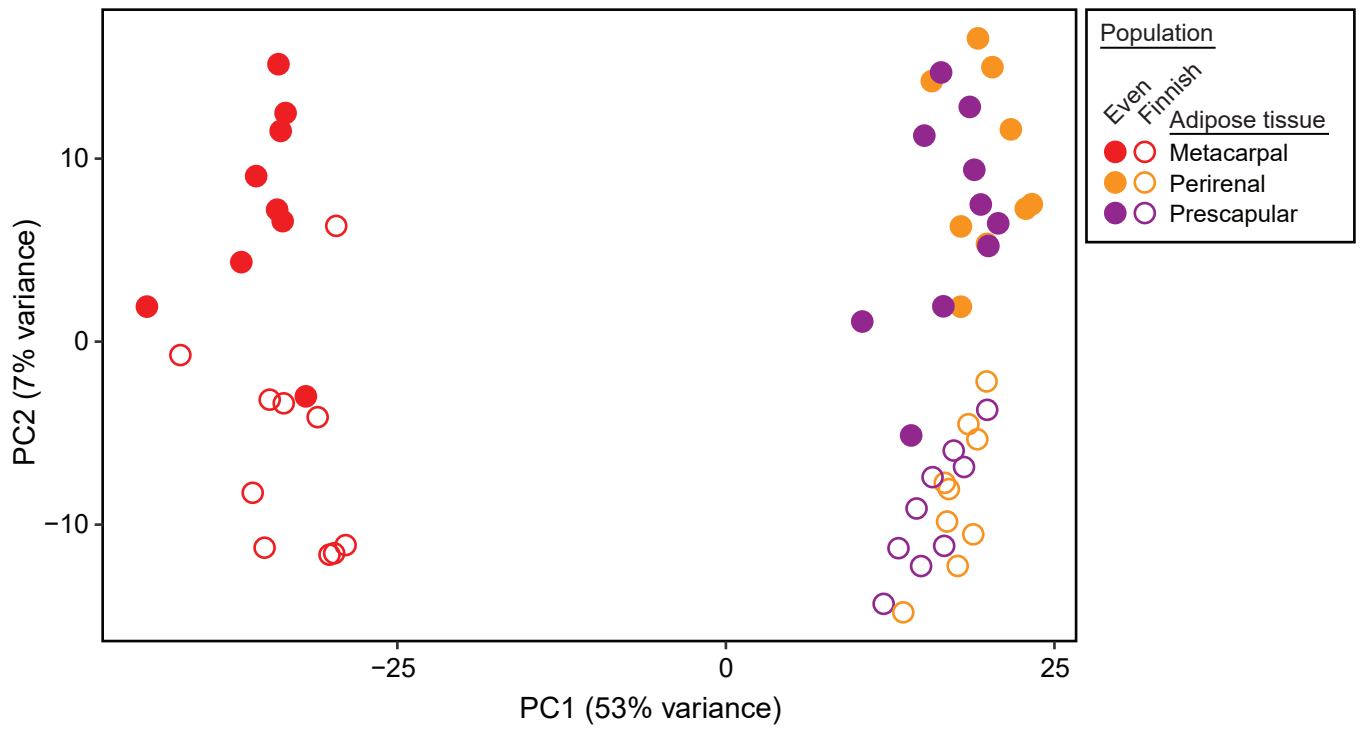

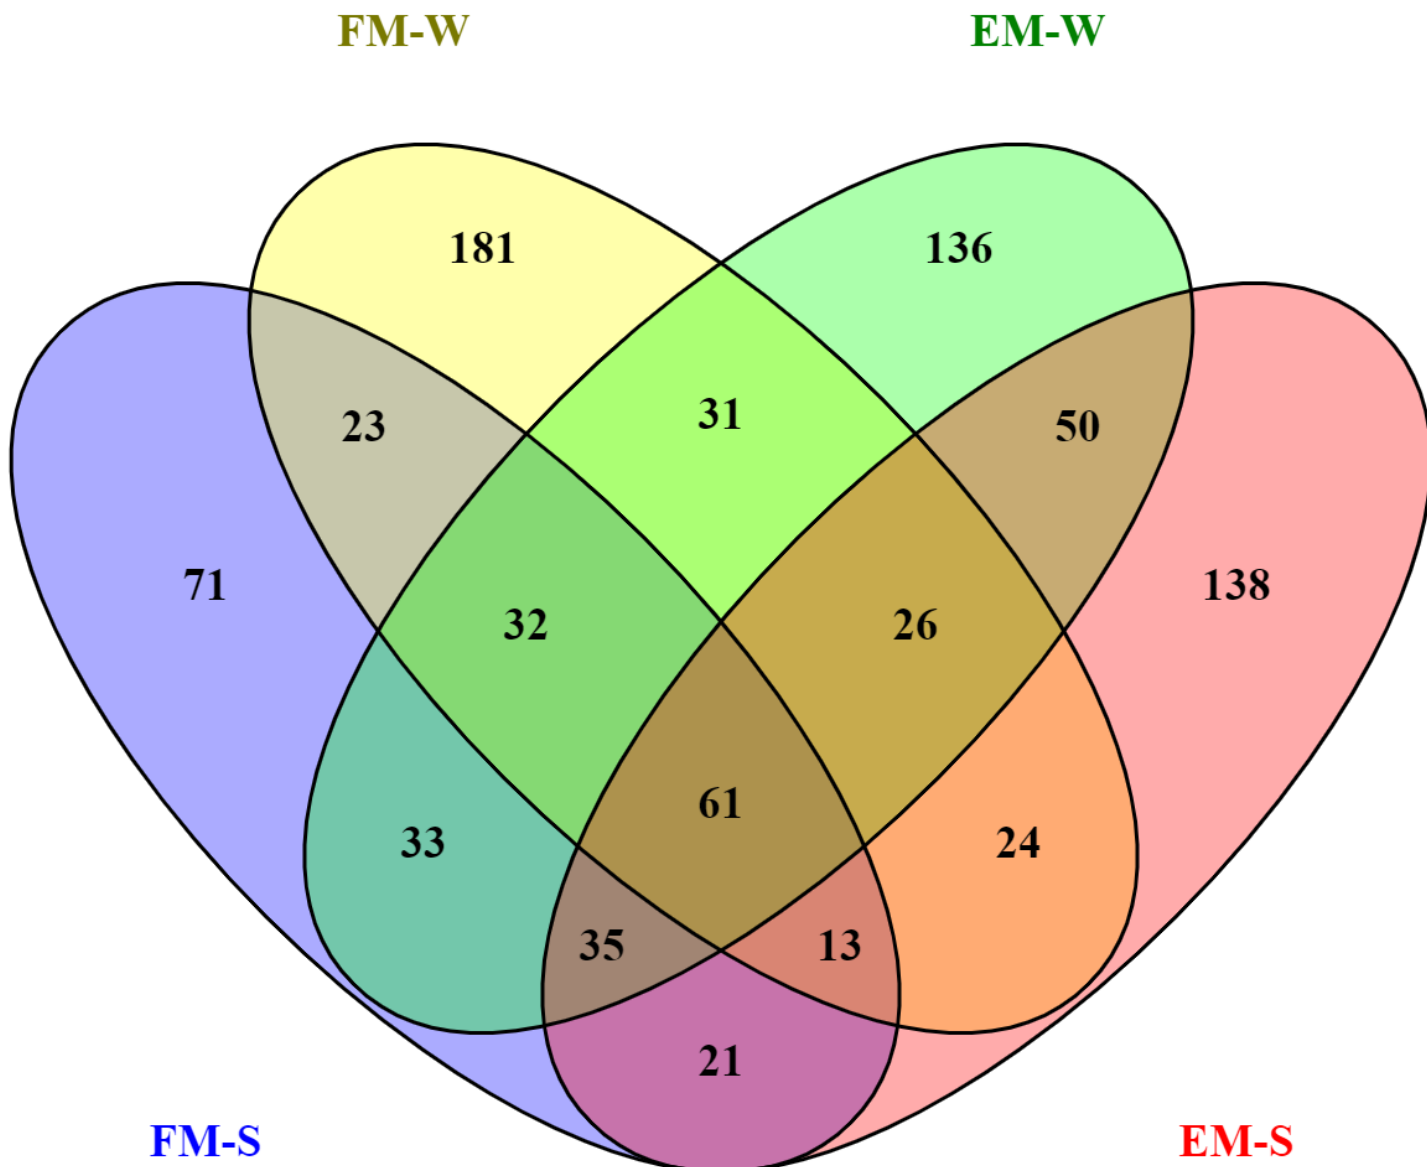

## Prescapular adipose tissue

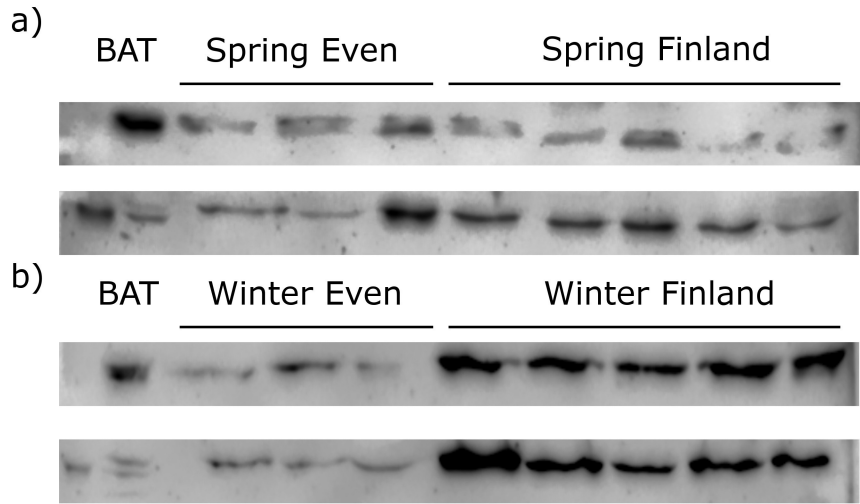

c) **UCP1 - Prescapular adipose tissue**

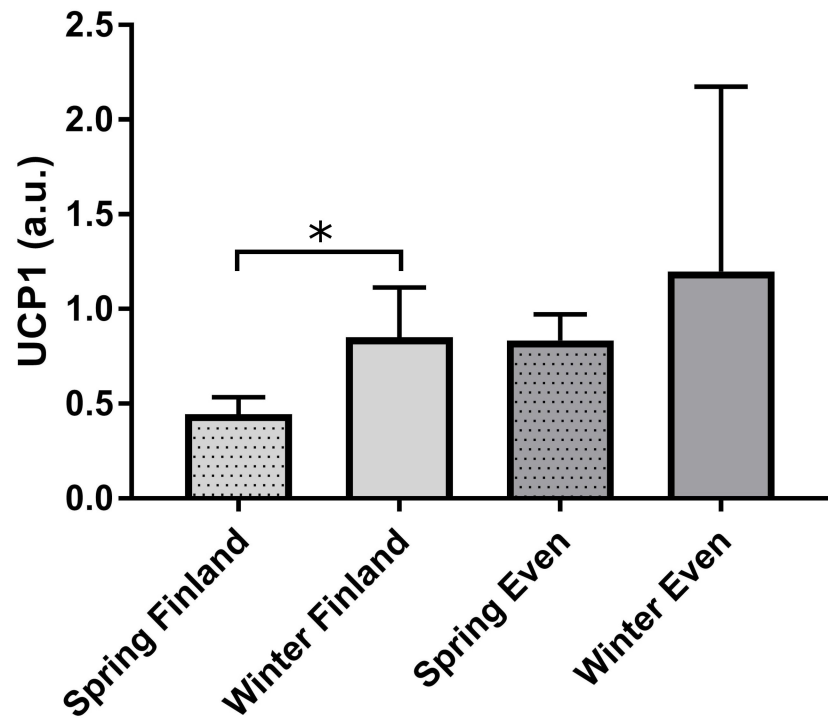

## Perirenal adipose tissue

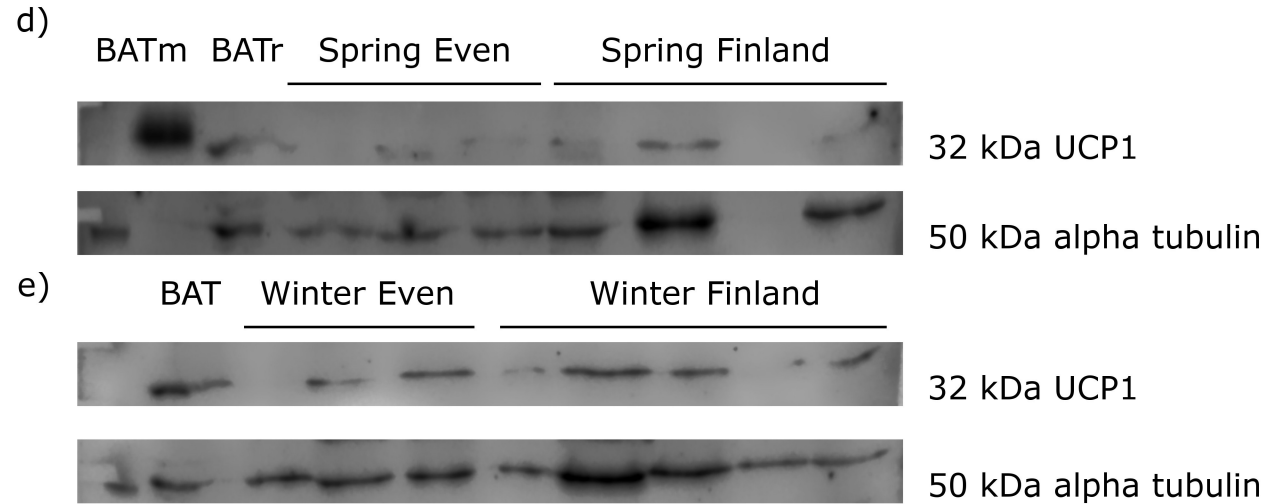

f) **UCP1 - Perirenal adipose tissue**

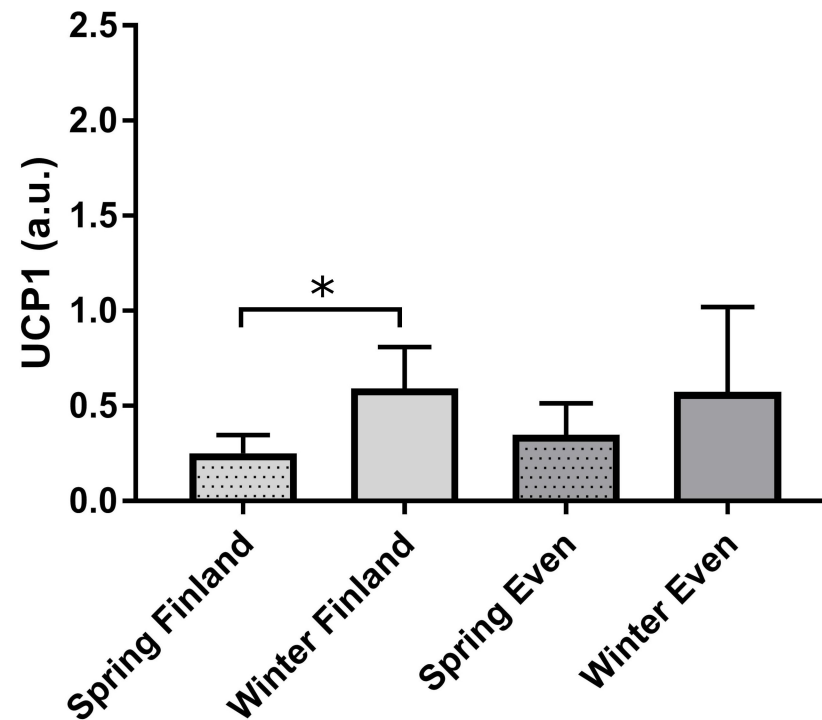

## COX4 muscle

## COX4 liver

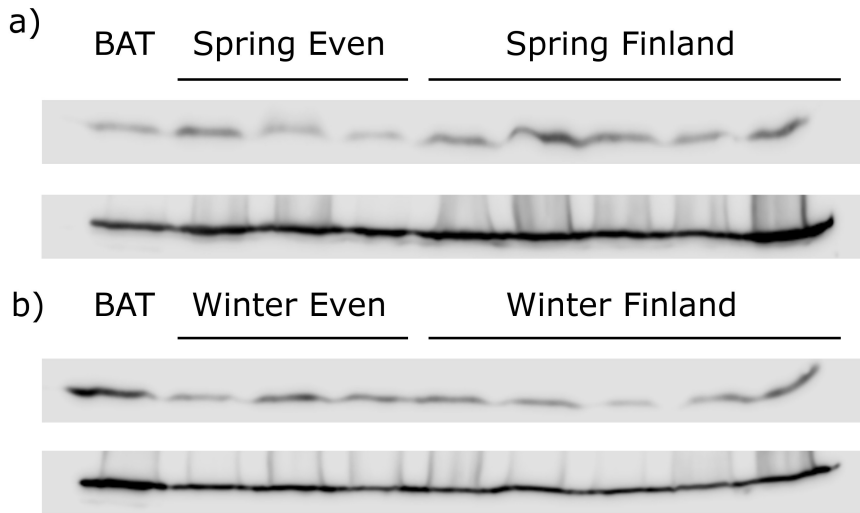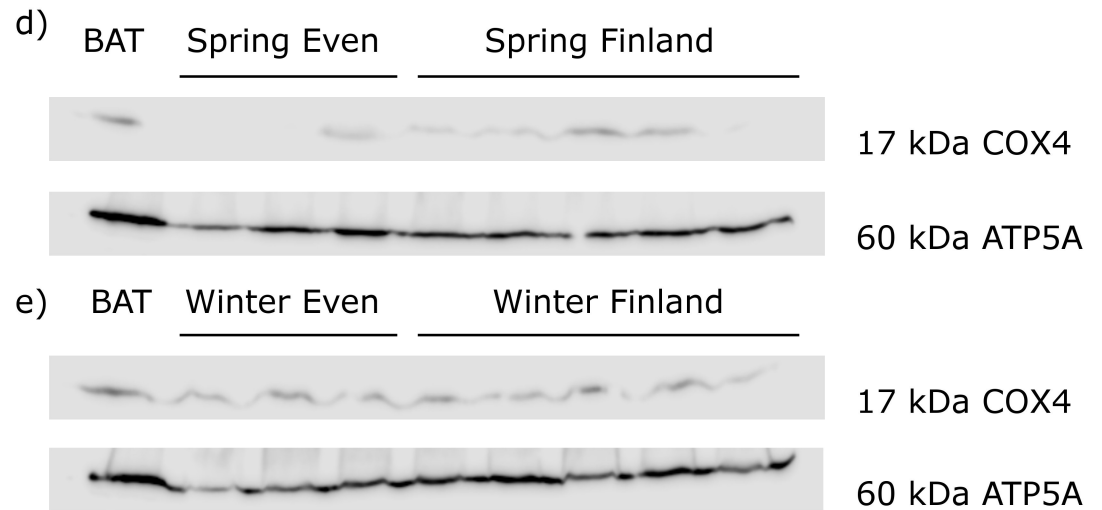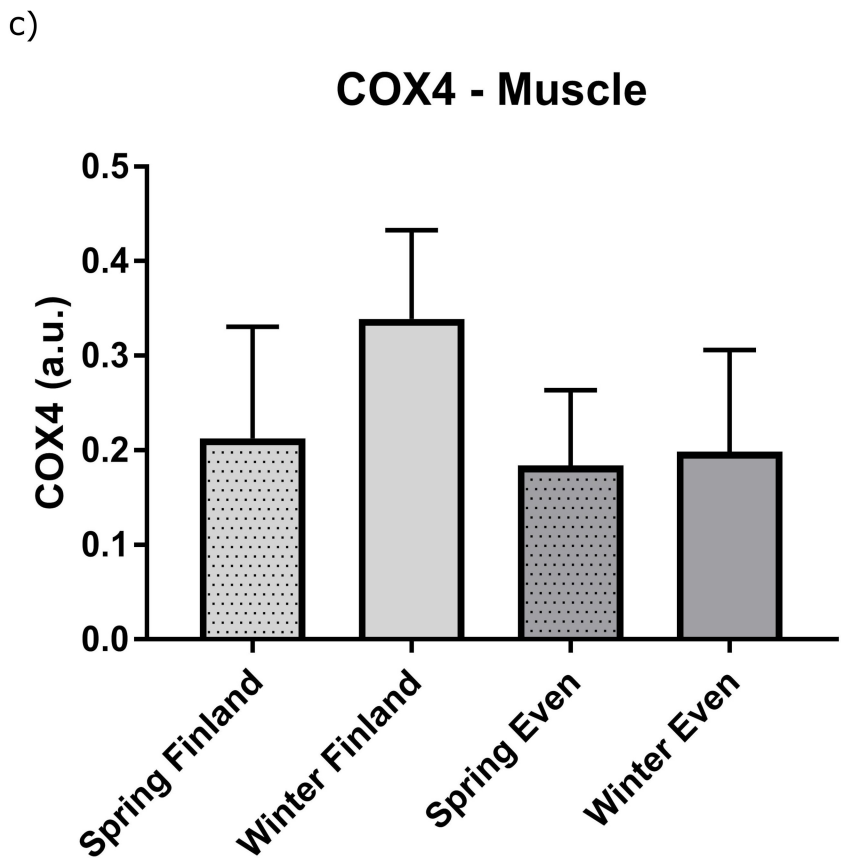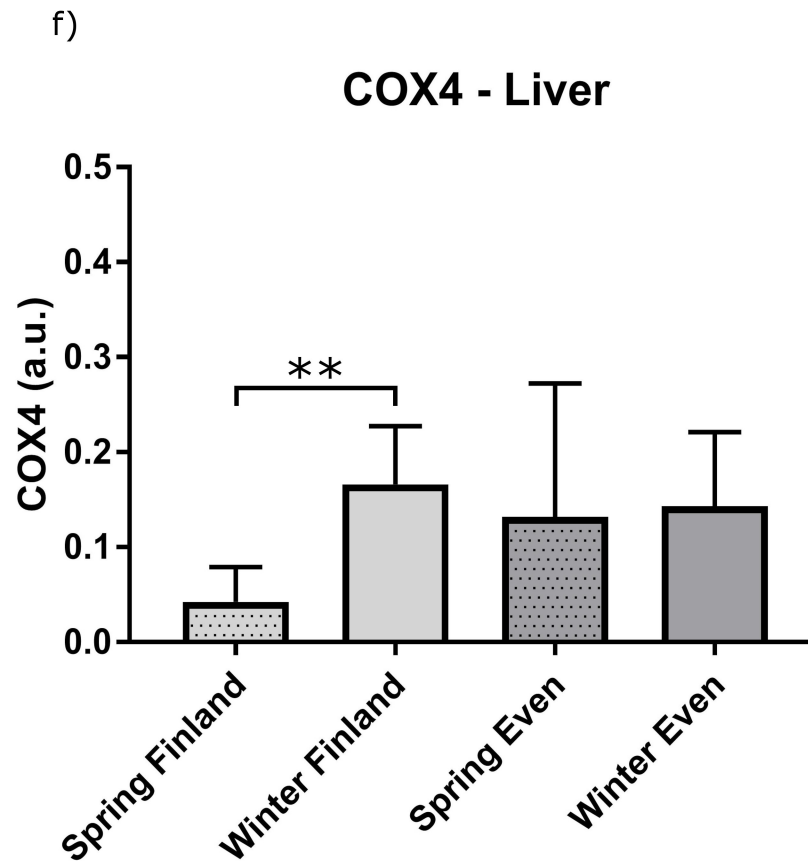

a)

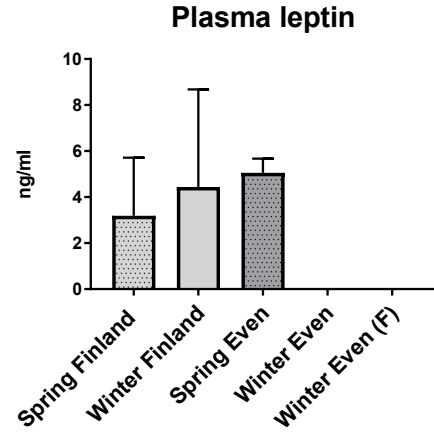

b)

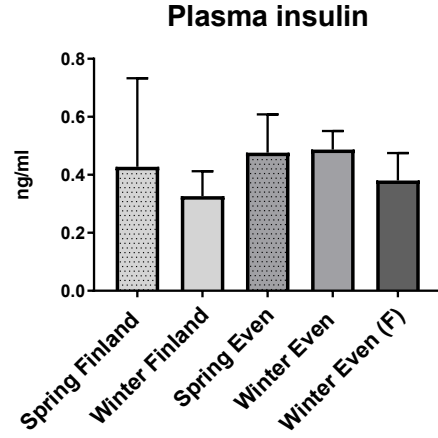

c)

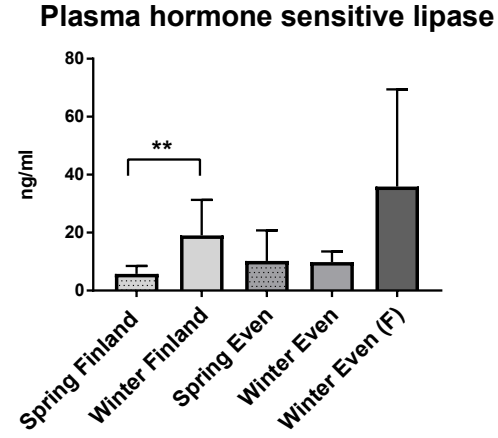

d)

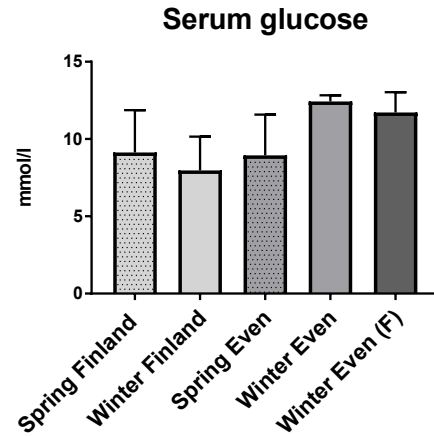

e)

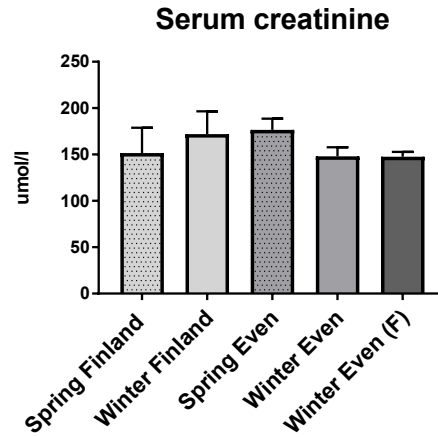

f)

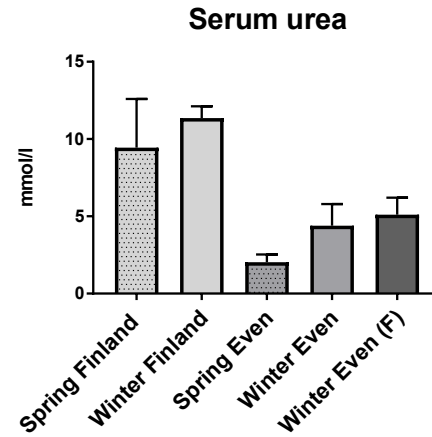

g)

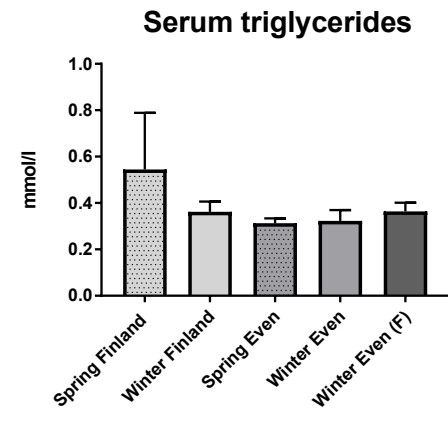

Source: https://www.biorxiv.org/content/10.1101/2021.04.17.440269v2.full.pdf
